# Supplementary material for: Study on the Anti-Mycobacterium marinum Activity of a Series of Marine-Derived 14-Membered Resorcylic Acid Lactone Derivatives
Source: MDPI journal article supplement (doi:10.3390/md22030135), 2024-03-16
Supplement: s1 [file s1]

# Study on the Anti-*Mycobacterium marinum* Activity of a Series of Marine-Derived 14-Membered Resorcylic Acid Lactone Derivatives

Qian-Qian Jing<sup>1,†</sup>, Jun-Na Yin<sup>1,†</sup>, Ya-Jie Cheng<sup>1</sup>, Qun Zhang<sup>1</sup>, Xi-Zhen Cao<sup>1</sup>, Wei-Feng Xu<sup>1,2</sup>, Chang-Lun Shao<sup>1,3,4,\*</sup>, and Mei-Yan Wei<sup>1,\*</sup>

<sup>1</sup> Key Laboratory of Marine Drugs, the Ministry of Education of China, School of Medicine and Pharmacy, Ocean University of China, Qingdao 266003, China; jingqianqian1231@163.com (Q.-Q.J.); yinjunna@163.com (J.-N.Y.); yajiecheng1212@163.com (Y.-J.C.); zhangqunnn@163.com; (Q.Z.); caoxizhen2022@163.com (X.-Z.C.); xuweifeng\_u@163.com (W.-F.X)

<sup>2</sup> State Key Laboratory for Chemistry and Molecular Engineering of Medicinal Resources, College of Chemistry and Pharmaceutical Sciences, Guangxi Normal University, Guilin 541004, China

<sup>3</sup> Laoshan Laboratory, Qingdao 266237, China

<sup>4</sup> Key Laboratory of Tropical Medicinal Resource Chemistry of Ministry of Education, College of Chemistry and Chemical Engineering, Hainan Normal University, Haikou 571158, China

\* Correspondence: shaochanglun@163.com (C.-L.S.); mywei95@126.com (M.-Y.W.)

## Content of Supporting Information

**Table S1.** The derivatives **39 – 97** of zeaenol (**1**).

**Table S2.** Anhydride, acyl chloride reagents or carboxylic acid reagents used to generate compounds **24–38**.

**Figure S1.**  $^1\text{H}$  NMR (400 MHz, Chloroform-*d*) spectrum of compound **19**.

**Figure S2.**  $^{13}\text{C}$  NMR (100 MHz, Chloroform-*d*) spectrum of compound **19**.

**Figure S3.** HR-ESI-MS spectrum of compound **19**.

**Figure S4.**  $^1\text{H}$  NMR (400 MHz, Chloroform-*d*) spectrum of compound **24**.

**Figure S5.**  $^{13}\text{C}$  NMR (100 MHz, Chloroform-*d*) spectrum of compound **24**.

**Figure S6.** HR-ESI-MS spectrum of compound **24**.

**Figure S7.**  $^1\text{H}$  NMR (400 MHz, Chloroform-*d*) spectrum of compound **25**.

**Figure S8.**  $^{13}\text{C}$  NMR (100 MHz, Chloroform-*d*) spectrum of compound **25**.

**Figure S9.** HR-ESI-MS spectrum of compound **25**.

**Figure S10.**  $^1\text{H}$  NMR (400 MHz, Chloroform-*d*) spectrum of compound **26**.

**Figure S11.**  $^{13}\text{C}$  NMR (100 MHz, Chloroform-*d*) spectrum of compound **26**.

**Figure S12.** HR-ESI-MS spectrum of compound **26**.

**Figure S13.**  $^1\text{H}$  NMR (400 MHz, Chloroform-*d*) spectrum of compound **27**.

**Figure S14.**  $^{13}\text{C}$  NMR (100 MHz, Chloroform-*d*) spectrum of compound **27**.

**Figure S15.** HR-ESI-MS spectrum of compound **27**.

**Figure S16.**  $^1\text{H}$  NMR (400 MHz, Chloroform-*d*) spectrum of compound **28**.

**Figure S17.**  $^{13}\text{C}$  NMR (100 MHz, Chloroform-*d*) spectrum of compound **28**.

**Figure S18.** HR-ESI-MS spectrum of compound **28**.

**Figure S19.**  $^1\text{H}$  NMR (400 MHz, Chloroform-*d*) spectrum of compound **29**.

**Figure S20.**  $^{13}\text{C}$  NMR (100 MHz, Chloroform-*d*) spectrum of compound **29**.

**Figure S21.** HR-ESI-MS spectrum of compound **29**.

**Figure S22.**  $^1\text{H}$  NMR (400 MHz, Chloroform-*d*) spectrum of compound **30**.

**Figure S23.**  $^{13}\text{C}$  NMR (100 MHz, Chloroform-*d*) spectrum of compound **30**.

**Figure S24.** HR-ESI-MS spectrum of compound **30**.

**Figure S25.**  $^1\text{H}$  NMR (400 MHz, Chloroform-*d*) spectrum of compound **31**.

**Figure S26.**  $^{13}\text{C}$  NMR (100 MHz, Chloroform-*d*) spectrum of compound **31**.

**Figure S27.** HR-ESI-MS spectrum of compound **31**.

**Figure S28.**  $^1\text{H}$  NMR (400 MHz, Chloroform-*d*) spectrum of compound **32**.

**Figure S29.**  $^{13}\text{C}$  NMR (100 MHz, Chloroform-*d*) spectrum of compound **32**.

**Figure S30.** HR-ESI-MS spectrum of compound **32**.

**Figure S31.**  $^1\text{H}$  NMR (400 MHz, Chloroform-*d*) spectrum of compound **33**.

**Figure S32.**  $^{13}\text{C}$  NMR (100 MHz, Chloroform-*d*) spectrum of compound **33**.

**Figure S33.** HR-ESI-MS spectrum of compound **33**.

**Figure S34.**  $^1\text{H}$  NMR (400 MHz, Chloroform-*d*) spectrum of compound **34**.

**Figure S35.**  $^{13}\text{C}$  NMR (100 MHz, Chloroform-*d*) spectrum of compound **34**.

**Figure S36.** HR-ESI-MS spectrum of compound **34**.

**Figure S37.**  $^1\text{H}$  NMR (400 MHz, Chloroform-*d*) spectrum of compound **35**.

**Figure S38.**  $^{13}\text{C}$  NMR (100 MHz, Chloroform-*d*) spectrum of compound **35**.

**Figure S39.** HR-ESI-MS spectrum of compound **35**.

**Figure S40.**  $^1\text{H}$  NMR (400 MHz, Chloroform-*d*) spectrum of compound **36**.

**Figure S41.**  $^{13}\text{C}$  NMR (100 MHz, Chloroform-*d*) spectrum of compound **36**.

**Figure S42.** HR-ESI-MS spectrum of compound **36**

**Figure S43.**  $^1\text{H}$  NMR (400 MHz, Chloroform-*d*) spectrum of compound **37**.

**Figure S44.**  $^{13}\text{C}$  NMR (100 MHz, Chloroform-*d*) spectrum of compound **37**.

**Figure S45.** HR-ESI-MS spectrum of compound **37**.

**Figure S46.**  $^1\text{H}$  NMR (400 MHz, Chloroform-*d*) spectrum of compound **38**.

**Figure S47.**  $^{13}\text{C}$  NMR (100 MHz, Chloroform-*d*) spectrum of compound **38**.

**Figure S48.** HR-ESI-MS spectrum of compound **38**.

**Table S1.** The derivatives **39 – 97** of zeaenol (**1**)

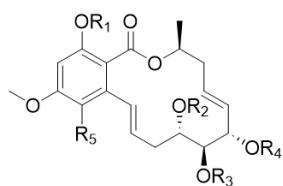

**39–57**

| No.       | R <sub>1</sub> | R <sub>2</sub> | R <sub>3</sub> | R <sub>4</sub> | R <sub>5</sub> | No.       | R <sub>1</sub> | R <sub>2</sub> | R <sub>3</sub> | R <sub>4</sub> | R <sub>5</sub> |
|-----------|----------------|----------------|----------------|----------------|----------------|-----------|----------------|----------------|----------------|----------------|----------------|
| <b>39</b> |                | H              | H              | H              | H              | <b>49</b> |                | H              | H              | H              | H              |
| <b>40</b> |                | H              | H              | H              | H              | <b>50</b> |                | H              | H              | H              | H              |
| <b>41</b> |                | H              | H              | H              | H              | <b>51</b> |                | H              | H              | H              | H              |
| <b>42</b> |                | H              | H              | H              | H              | <b>52</b> |                | H              | H              | H              | H              |
| <b>43</b> |                | H              | H              | H              | H              | <b>53</b> |                | H              | H              | H              | H              |
| <b>44</b> |                | H              | H              | H              | H              | <b>54</b> |                | H              | H              | H              | H              |
| <b>45</b> |                | H              | H              | H              | H              | <b>55</b> |                | H              | H              | H              | Cl             |
| <b>46</b> |                | H              | H              | H              | H              | <b>56</b> |                | H              | H              | H              | Cl             |
| <b>47</b> |                | H              | H              | H              | H              | <b>57</b> |                | H              | H              | H              | Cl             |
| <b>48</b> |                | H              | H              | H              | H              |           |                |                |                |                |                |

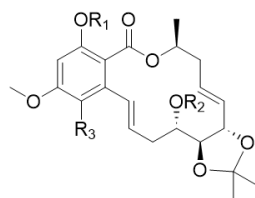

**58–81**

| No.       | R <sub>1</sub> | R <sub>2</sub> | R <sub>3</sub> | No.       | R <sub>1</sub> | R <sub>2</sub> | R <sub>3</sub> | No.       | R <sub>1</sub> | R <sub>2</sub> | R <sub>3</sub> |
|-----------|----------------|----------------|----------------|-----------|----------------|----------------|----------------|-----------|----------------|----------------|----------------|
| <b>58</b> |                | H              | H              | <b>66</b> |                | H              | H              | <b>74</b> |                | H              | H              |
| <b>59</b> |                |                | H              | <b>67</b> |                | H              | H              | <b>75</b> |                | H              | H              |

|    |                                                                                   |                                                                                   |   |    |                                                                                   |   |   |    |                                                                                     |   |   |
|----|-----------------------------------------------------------------------------------|-----------------------------------------------------------------------------------|---|----|-----------------------------------------------------------------------------------|---|---|----|-------------------------------------------------------------------------------------|---|---|
| 60 |  | H                                                                                 | H | 68 |  | H | H | 76 |  | H | H |
| 61 |  |  | H | 69 |  | H | H | 77 |  | H | H |
| 62 |  | H                                                                                 | H | 70 |  | H | H | 78 |  | H | H |
| 63 |  | H                                                                                 | H | 71 |  | H | H | 79 |  | H | H |
| 64 | H                                                                                 |  | H | 72 |  | H | H | 80 |  | H | H |
| 65 |  | H                                                                                 | H | 73 |  | H | H | 81 |  | H | H |

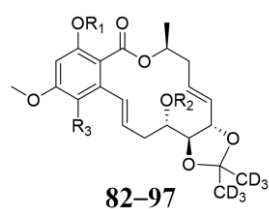

| No. | R <sub>1</sub>                                                                      | R <sub>2</sub>                                                                      | R <sub>3</sub> | No. | R <sub>1</sub>                                                                      | R <sub>2</sub> | R <sub>3</sub> | No. | R <sub>1</sub>                                                                        | R <sub>2</sub> | R <sub>3</sub> |
|-----|-------------------------------------------------------------------------------------|-------------------------------------------------------------------------------------|----------------|-----|-------------------------------------------------------------------------------------|----------------|----------------|-----|---------------------------------------------------------------------------------------|----------------|----------------|
| 82  | H                                                                                   | H                                                                                   | H              | 88  |  | H              | H              | 93  |  | H              | H              |
| 83  |  |  | H              | 89  |  | H              | H              | 94  |  | H              | H              |
| 84  |  | H                                                                                   | Cl             | 90  |  | H              | H              | 95  |  | H              | H              |
| 85  |  |  | H              | 91  |  | H              | H              | 96  |  | H              | H              |
| 86  | H                                                                                   | H                                                                                   | Cl             | 92  |  | H              | H              | 97  |  | H              | H              |
| 87  |  | H                                                                                   | H              |     |                                                                                     |                |                |     |                                                                                       |                |                |

**Table S2.** Anhydride, acyl chloride reagents or carboxylic acid reagents used to generate compounds **24–38**<sup>a</sup>.

| No.       | reagents              | Yield | No.       | reagents             | Yield | No.       | reagents                    | Yield |
|-----------|-----------------------|-------|-----------|----------------------|-------|-----------|-----------------------------|-------|
| <b>24</b> | 2-Methoxybenzoic acid | 83.2% | <b>29</b> | Benzoyl chloride     | 77.8% | <b>34</b> | Nicotinic acid              | 85.6% |
| <b>25</b> | 2-Furoic acid         | 70.3% | <b>30</b> | 2-Fluorobenzoic acid | 83.5% | <b>35</b> | Nicotinic acid              | 72.4% |
| <b>26</b> | 2-Furoic acid         | 60.6% | <b>31</b> | 2-Fluorobenzoic acid | 87.2% | <b>36</b> | Acetic anhydride            | 63.7% |
| <b>27</b> | 2-Furoic acid         | 73.4% | <b>32</b> | 2-Fluorobenzoic acid | 73.9% | <b>37</b> | Thiophene-2-carboxylic acid | 85.2% |
| <b>28</b> | Benzoyl chloride      | 63.7% | <b>33</b> | Nicotinic acid       | 67.7% | <b>38</b> | Thiophene-2-carboxylic acid | 87.7% |

<sup>a</sup> All reagents used in this study are commercial reagents.



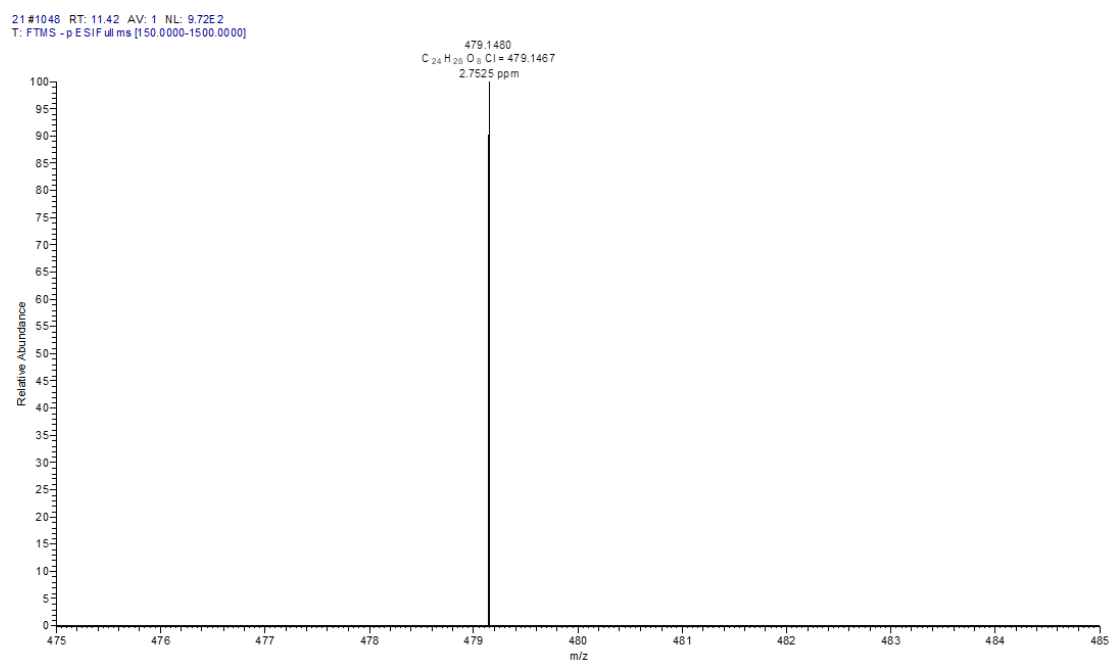

**Figure S3.** HR-ESI-MS spectrum of compound **19**.

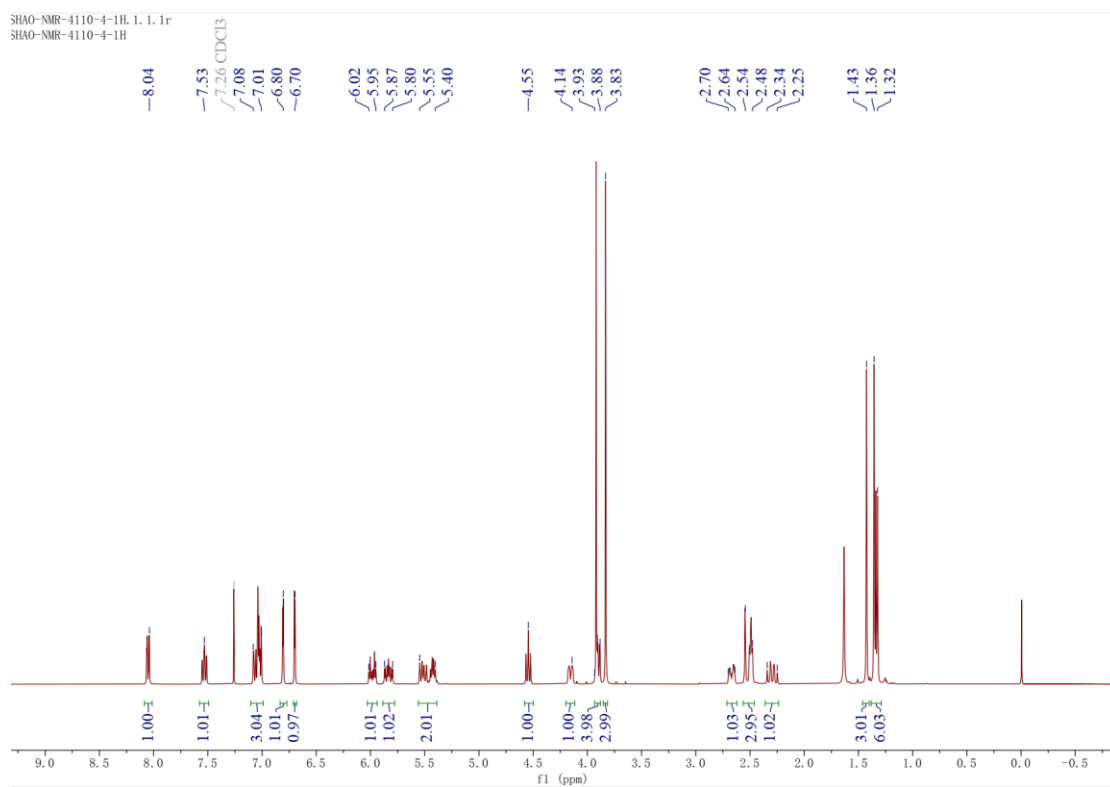

**Figure S4.** <sup>1</sup>H NMR (400 MHz, Chloroform-*d*) spectrum of compound **24**.



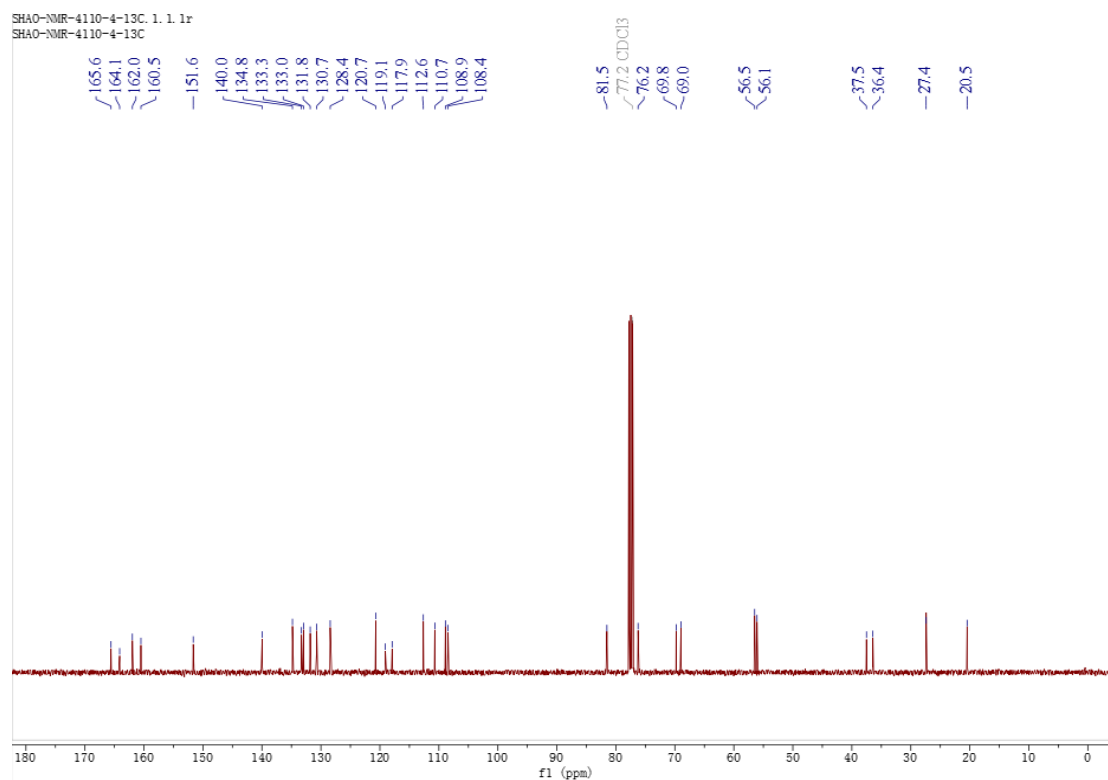

**Figure S5.**  $^{13}\text{C}$  NMR (100 MHz, Chloroform-*d*) spectrum of compound **24**.

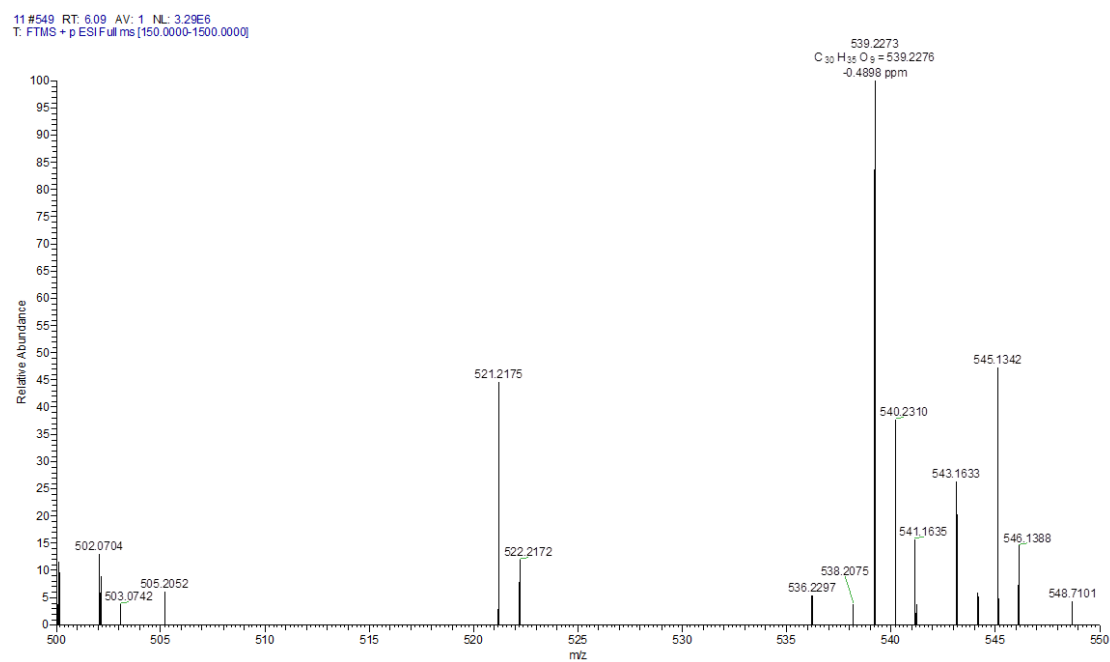

**Figure S6.** HR-ESI-MS spectrum of compound **24**.

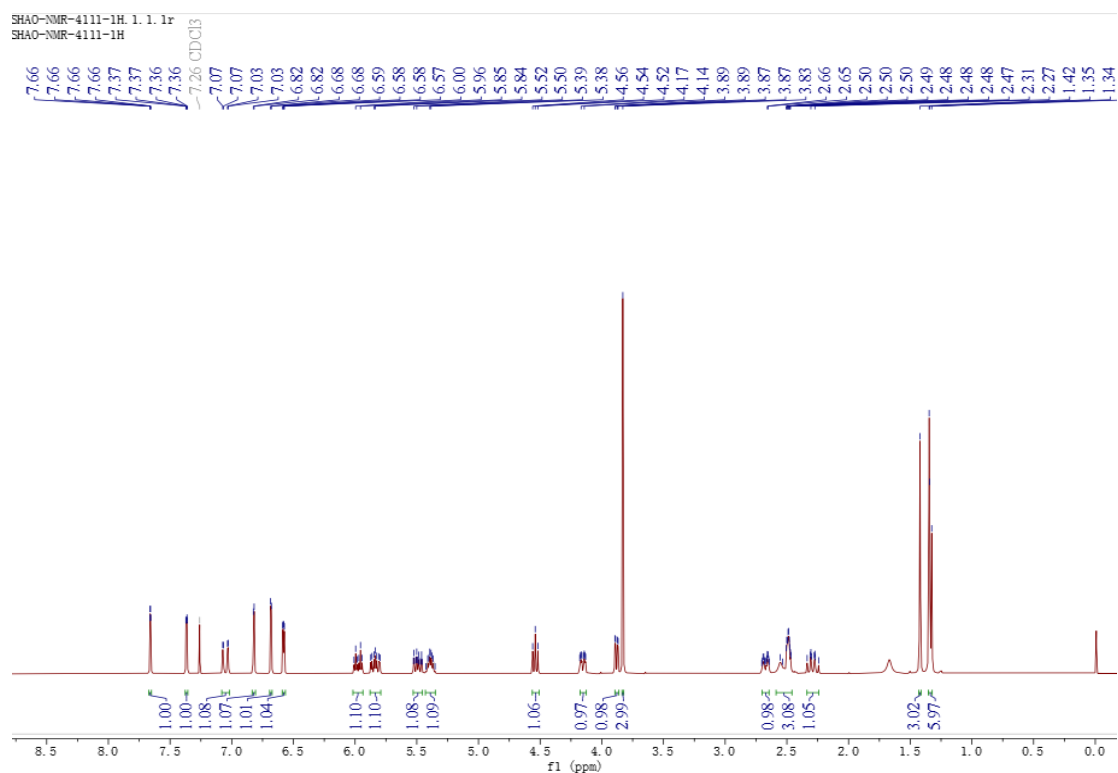

**Figure S7.** <sup>1</sup>H NMR (400 MHz, Chloroform-*d*) spectrum of compound **25**.

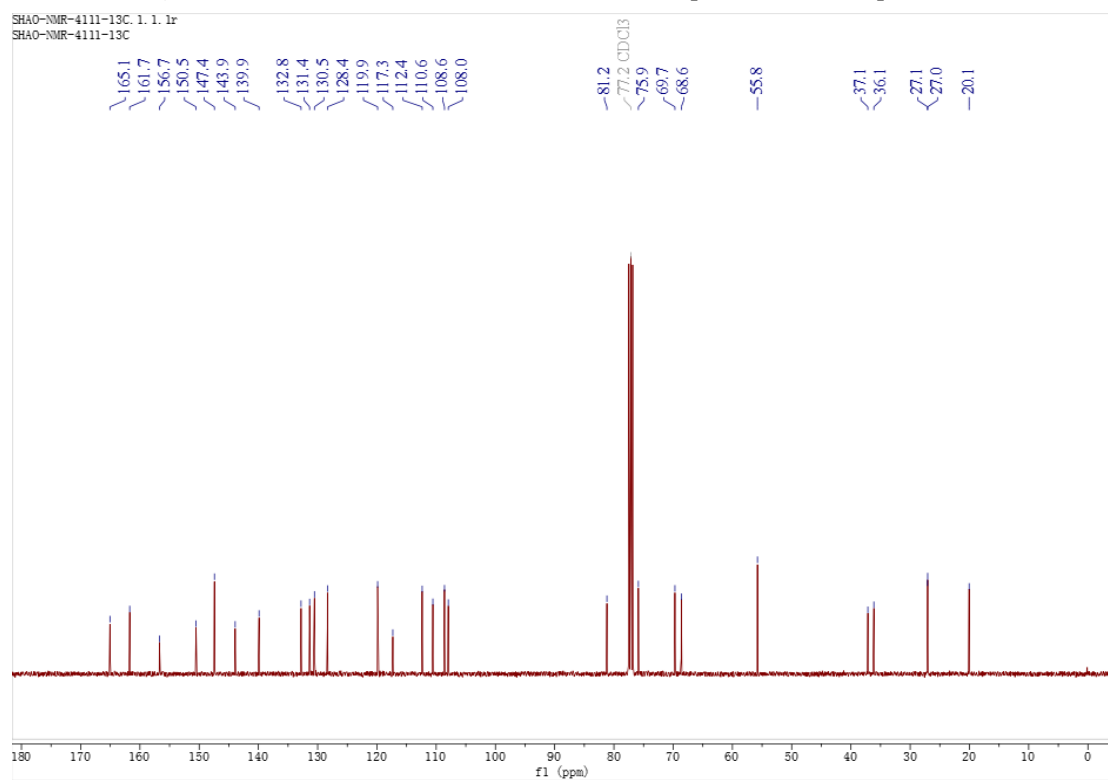

**Figure S8.** <sup>13</sup>C NMR (100 MHz, Chloroform-*d*) spectrum of compound **25**.

11#493 RT: 5.50 AV: 1 NL: 1.59E6  
T: FTMS + p ESIFull.ms[150.0000-1500.0000]

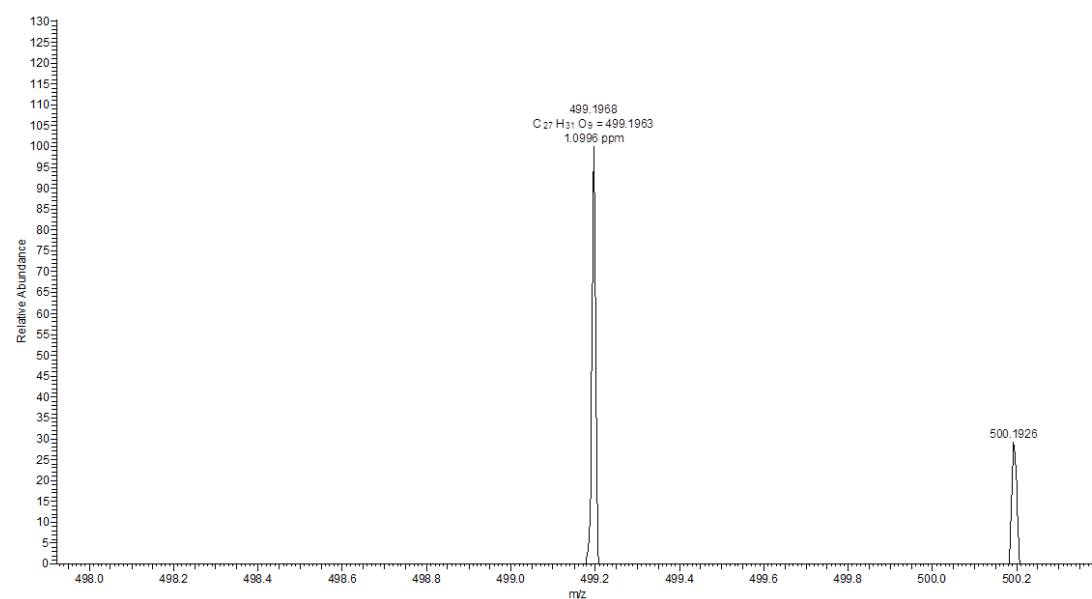

**Figure S9.** HR-ESI-MS spectrum of compound 25.

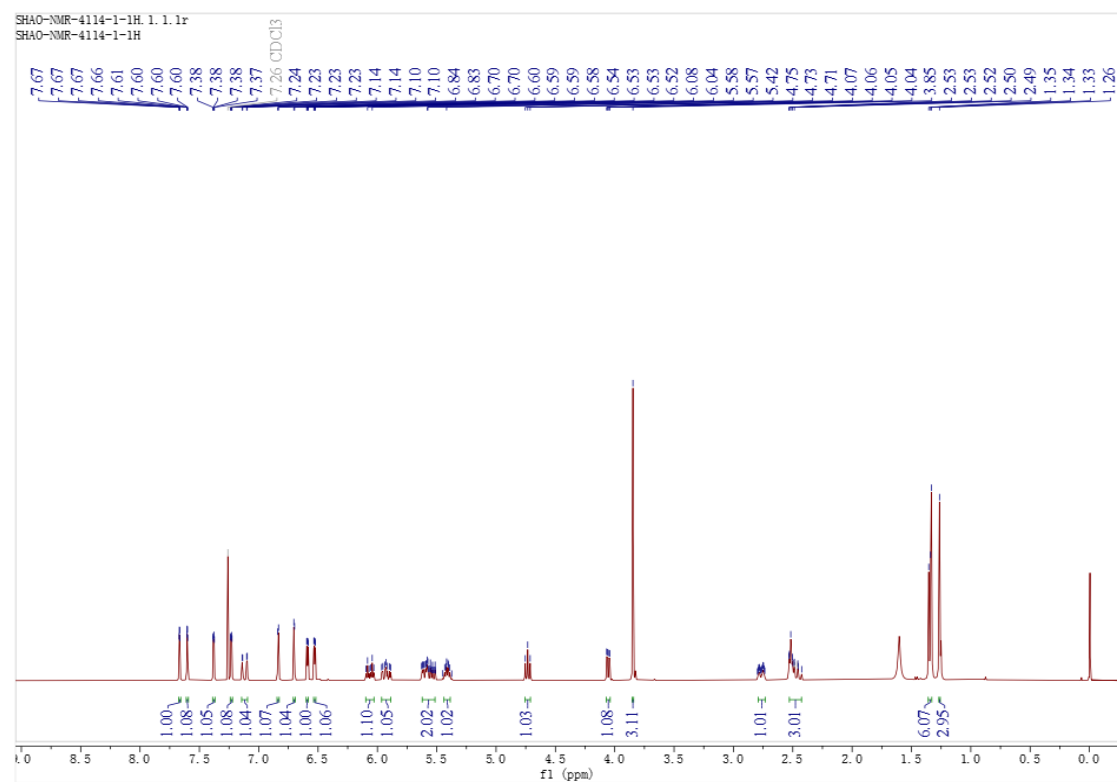

**Figure S10.** <sup>1</sup>H NMR (400 MHz, Chloroform-*d*) spectrum of compound 26.

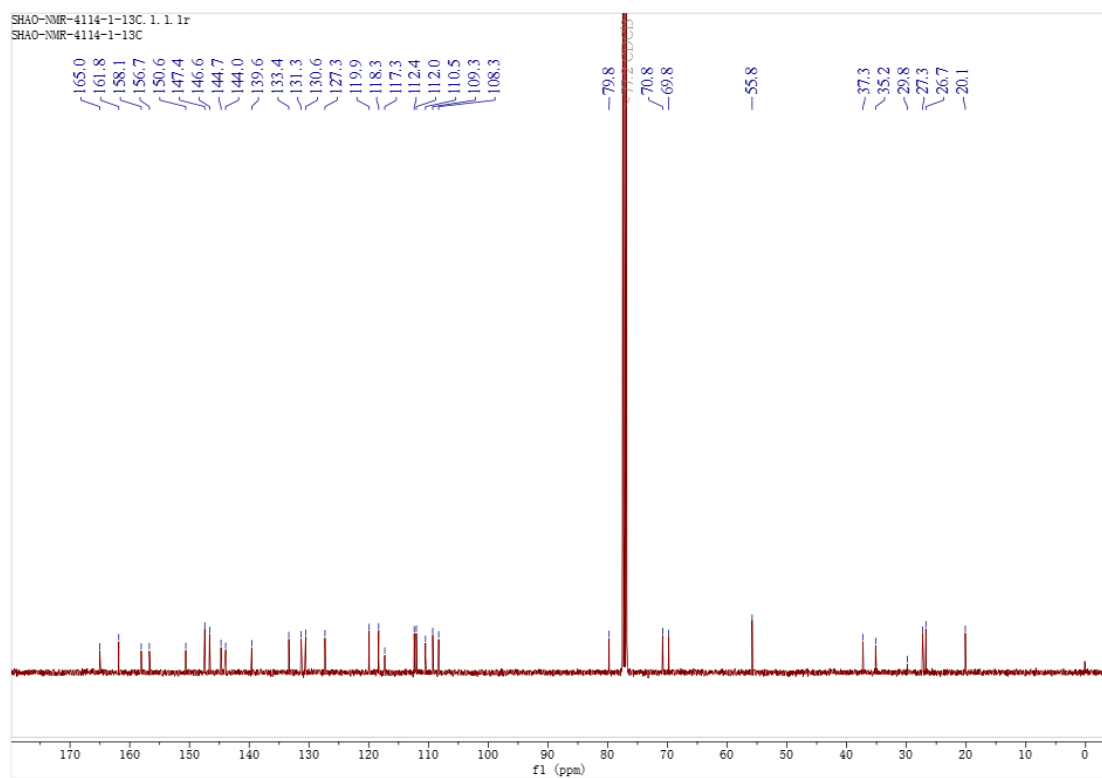

**Figure S11.** <sup>13</sup>C NMR (100 MHz, Chloroform-*d*) spectrum of compound **26**.

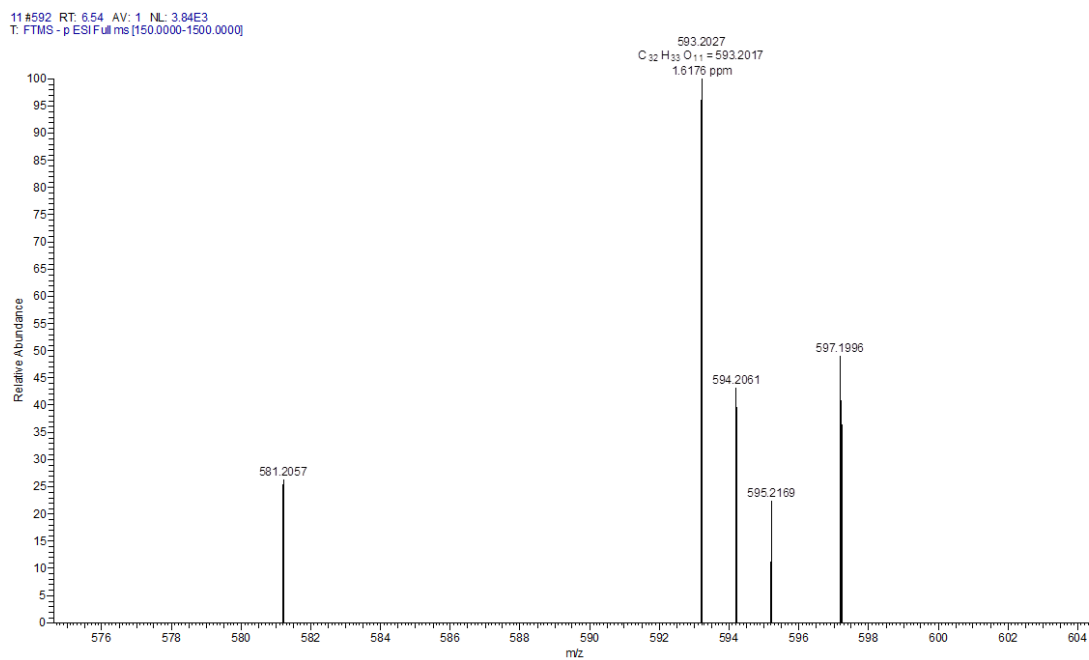

**Figure S12.** HR-ESI-MS spectrum of compound **26**.

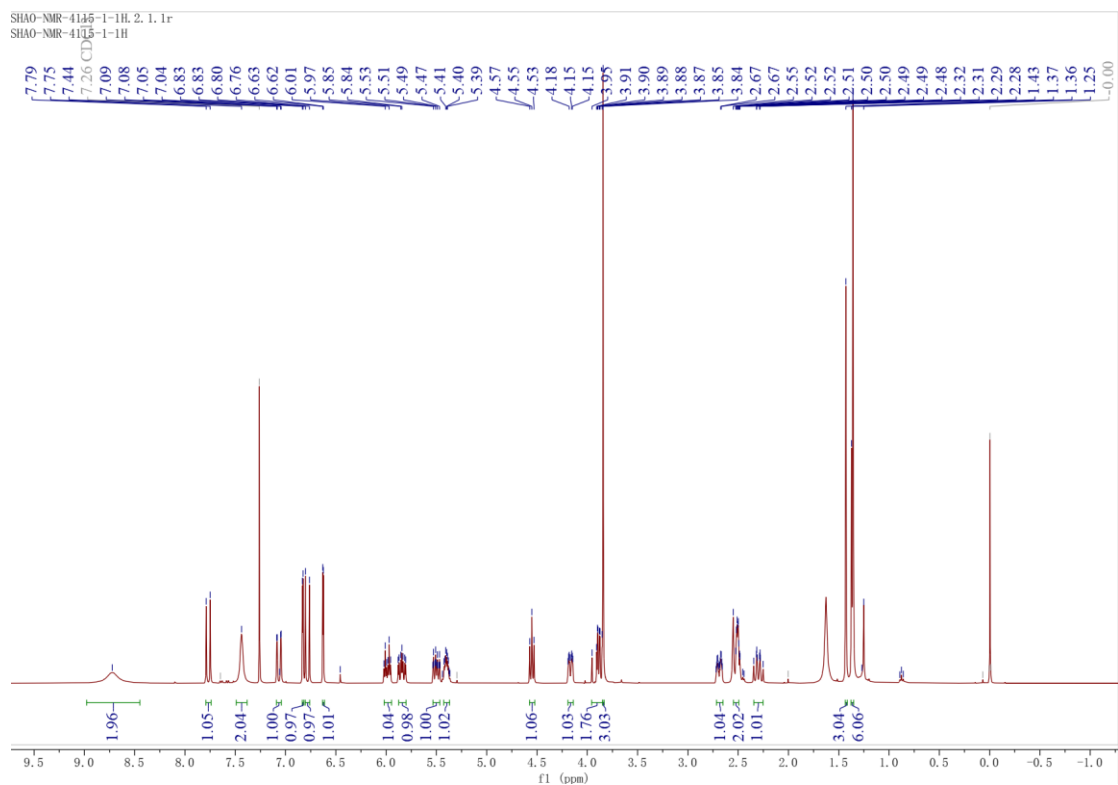

**Figure S13.**  $^1\text{H}$  NMR (400 MHz, Chloroform- $d$ ) spectrum of compound **27**.

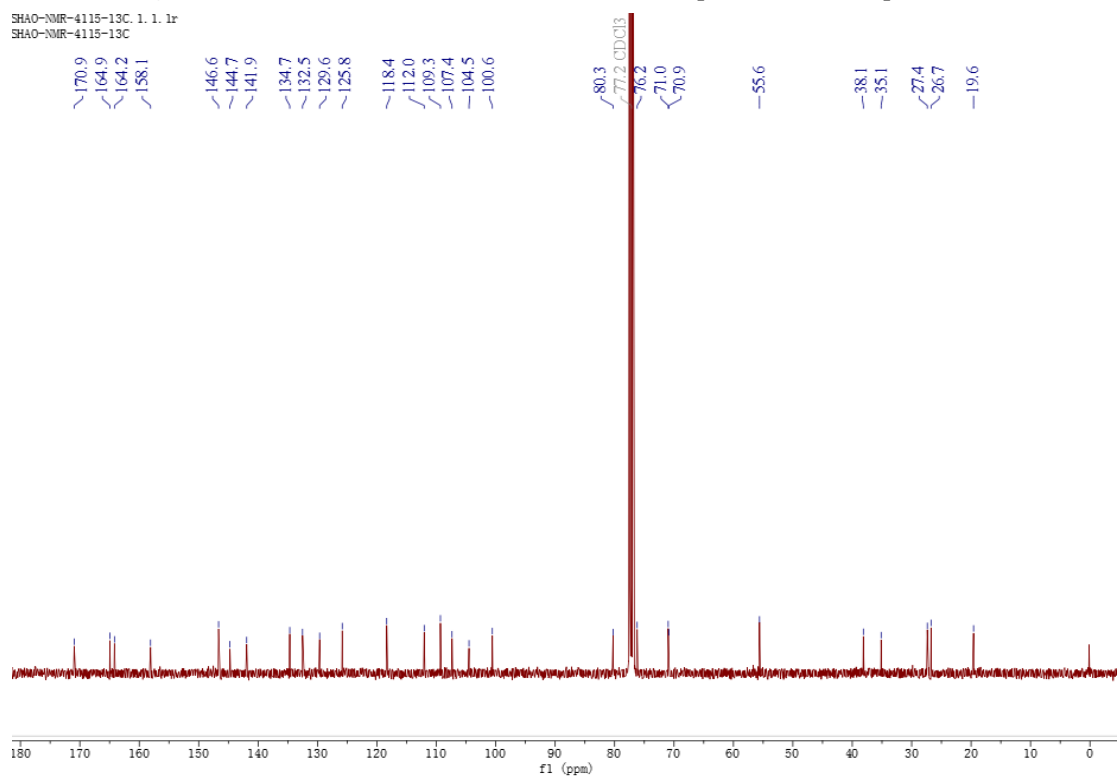

**Figure S14.**  $^{13}\text{C}$  NMR (100 MHz, Chloroform- $d$ ) spectrum of compound **27**.

12 #695 RT: 7.55 AV: 1 NL: 4.21E7  
T: FTMS + p ESIFull.ms [150.0000-1500.0000]

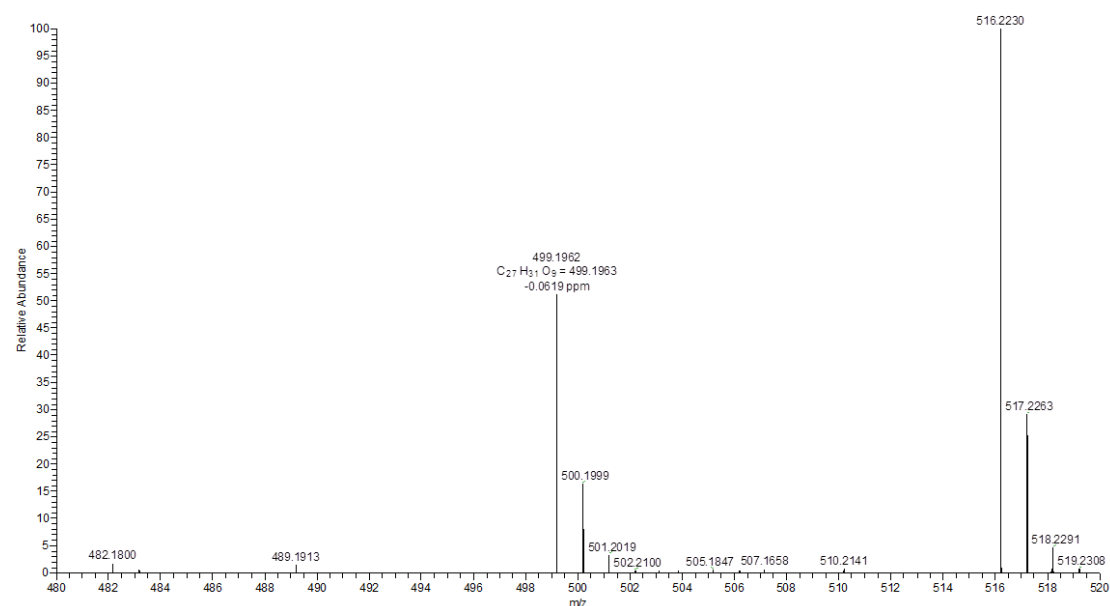

Figure S15. HR-ESI-MS spectrum of compound 27.

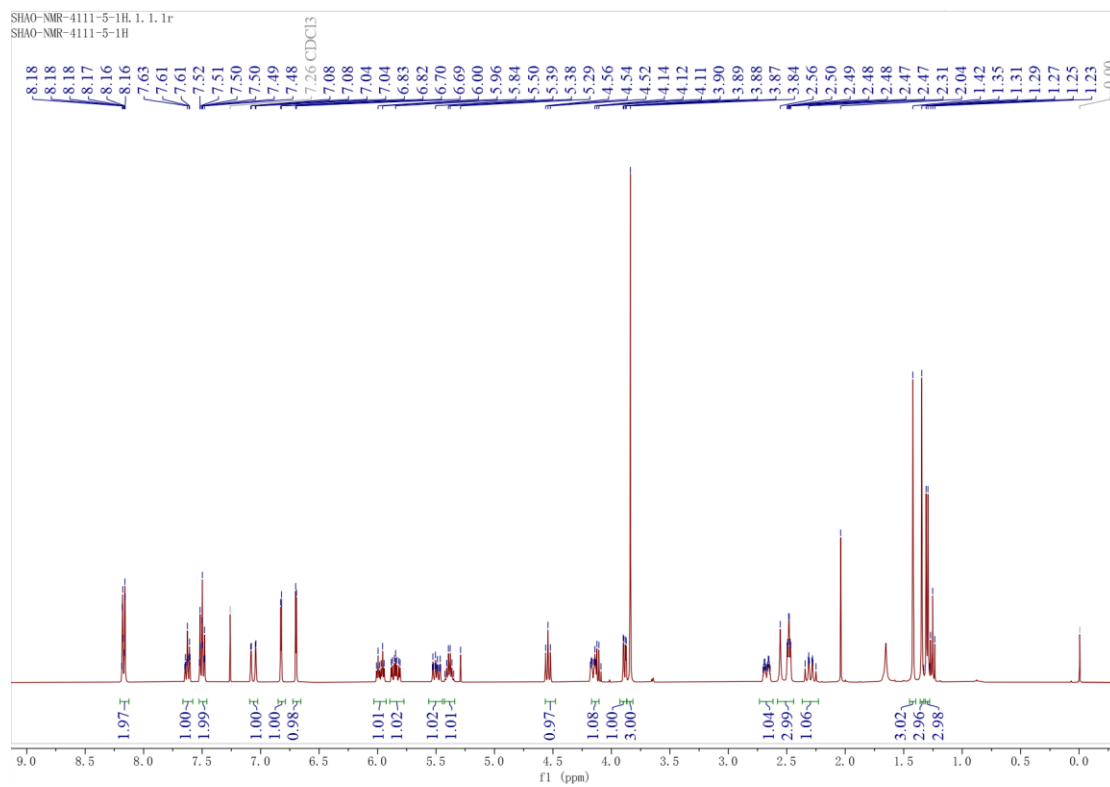

Figure S16. <sup>1</sup>H NMR (400 MHz, Chloroform-*d*) spectrum of compound 28.

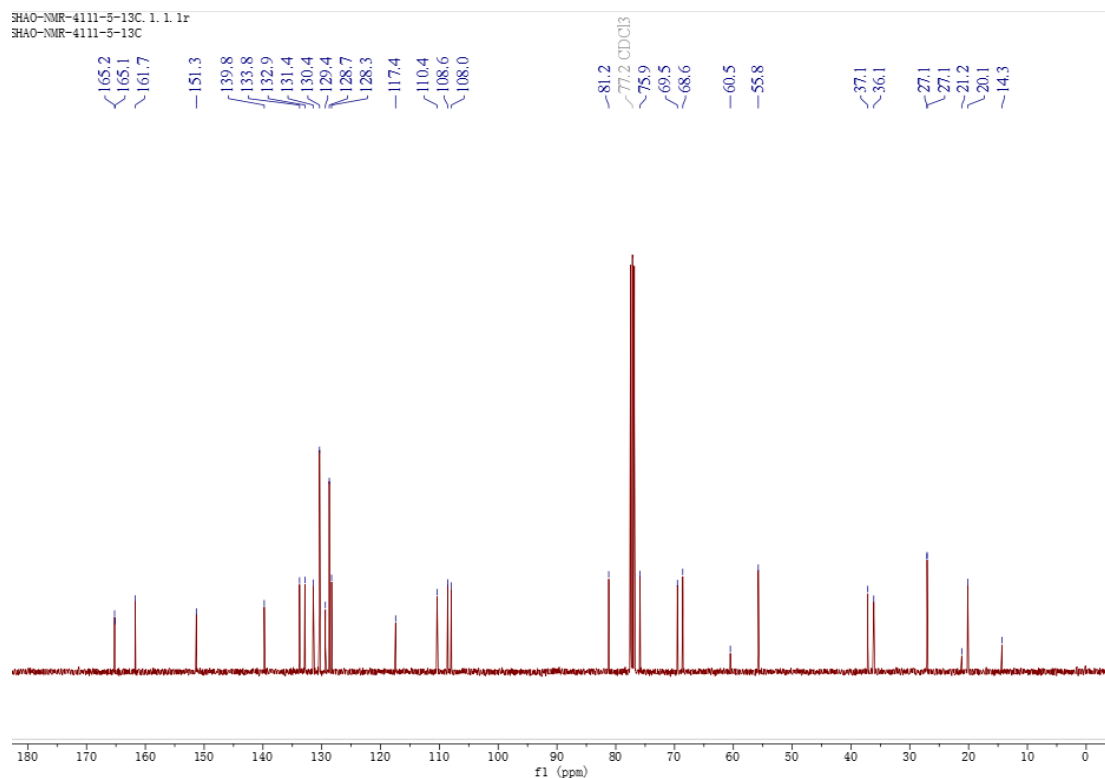

**Figure S17.** <sup>13</sup>C NMR (100 MHz, Chloroform-*d*) spectrum of compound **28**.

13 #605 RT: 6.61 AV: 1 NL: 4.21E6  
T: FTMS + p ESI Full ms [150.0000-1500.0000]

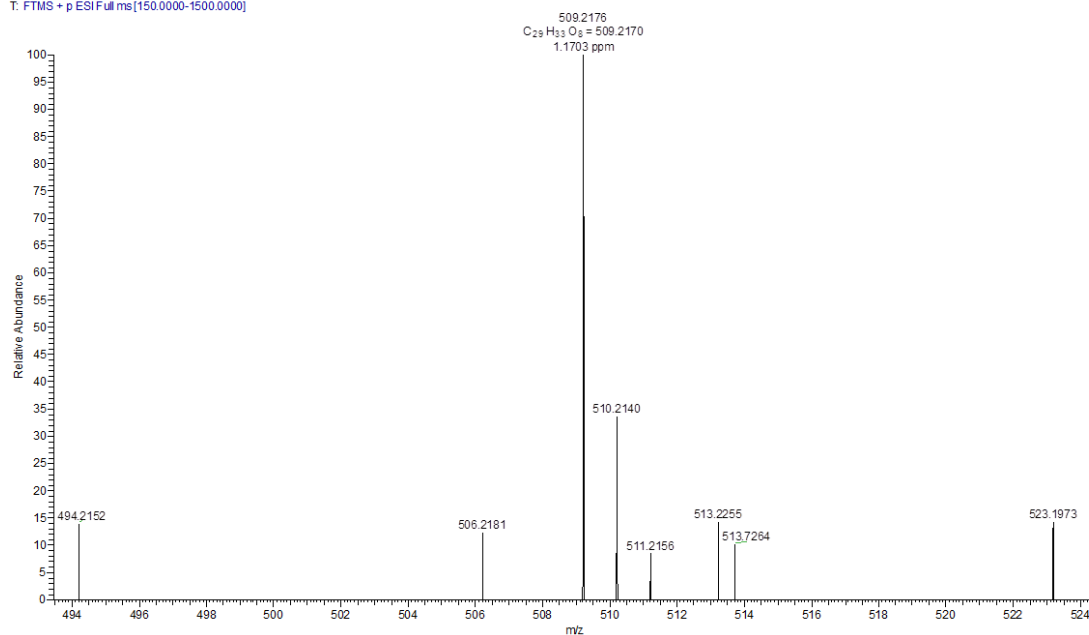

**Figure S18.** HR-ESI-MS spectrum of compound **28**.

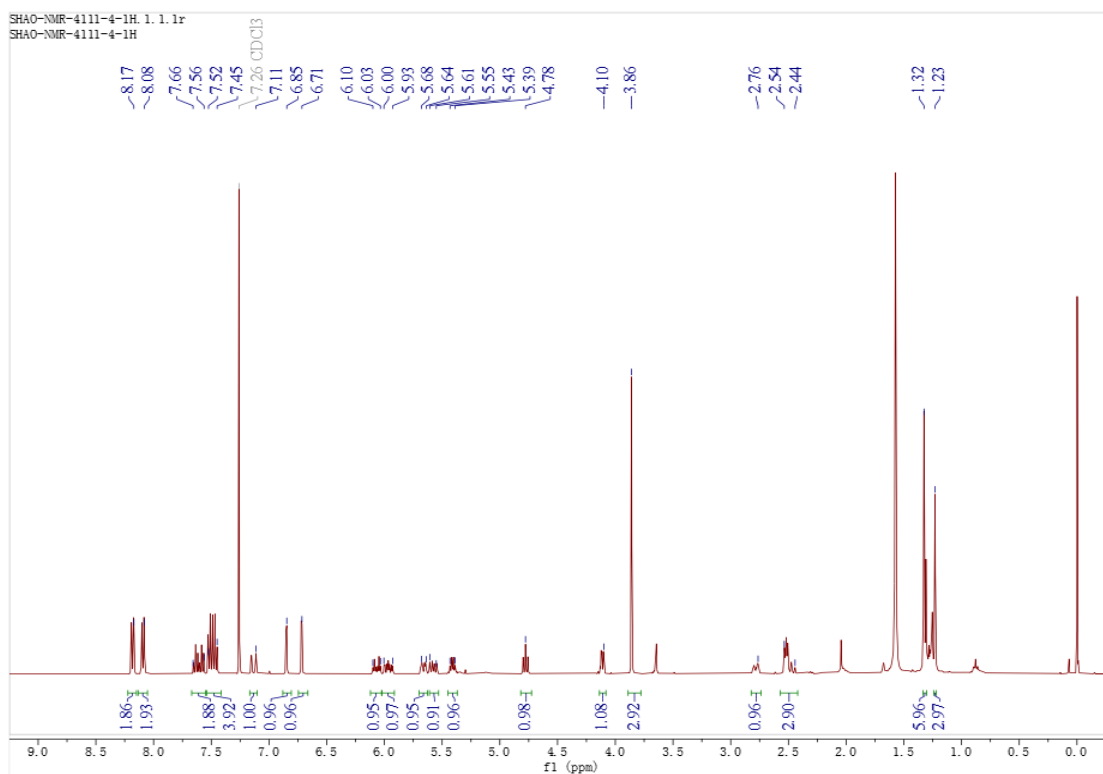

**Figure S19.** <sup>1</sup>H NMR (400 MHz, Chloroform-*d*) spectrum of compound **29**.

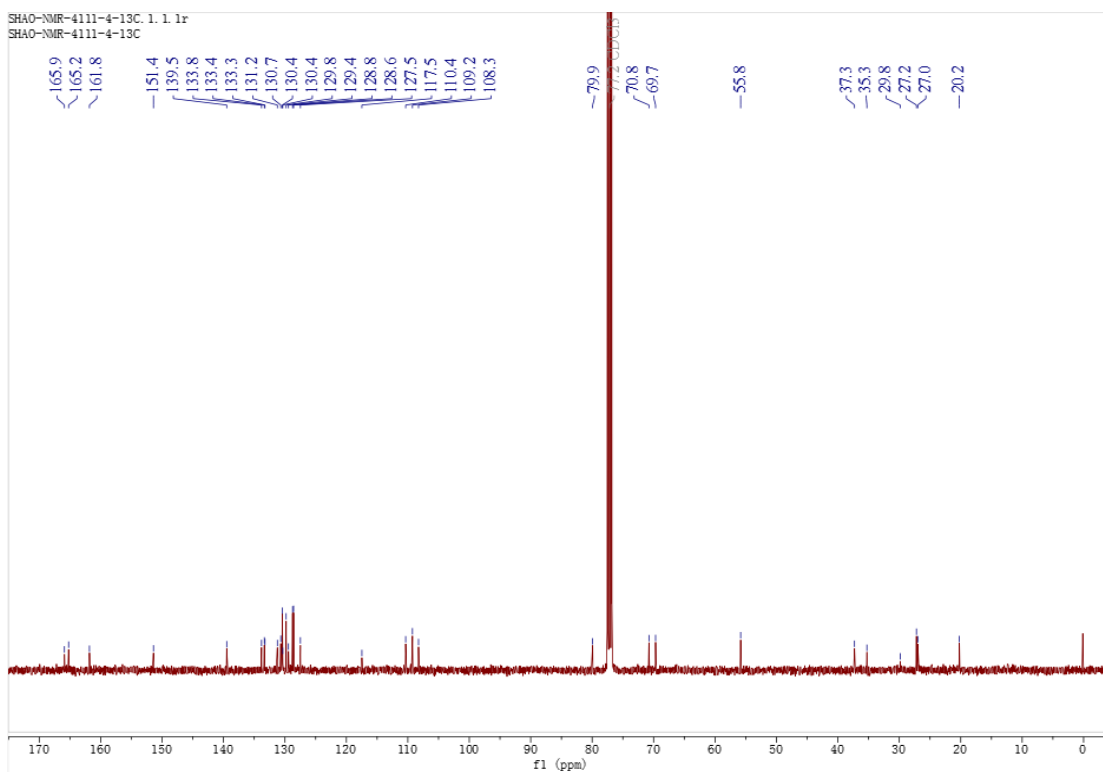

**Figure S20.** <sup>13</sup>C NMR (100 MHz, Chloroform-*d*) spectrum of compound **29**.



12 #789 RT: 8.55 AV: 1 NL: 8.20E5  
T: FTMS + p ESI Full ms [150.0000-1500.0000]

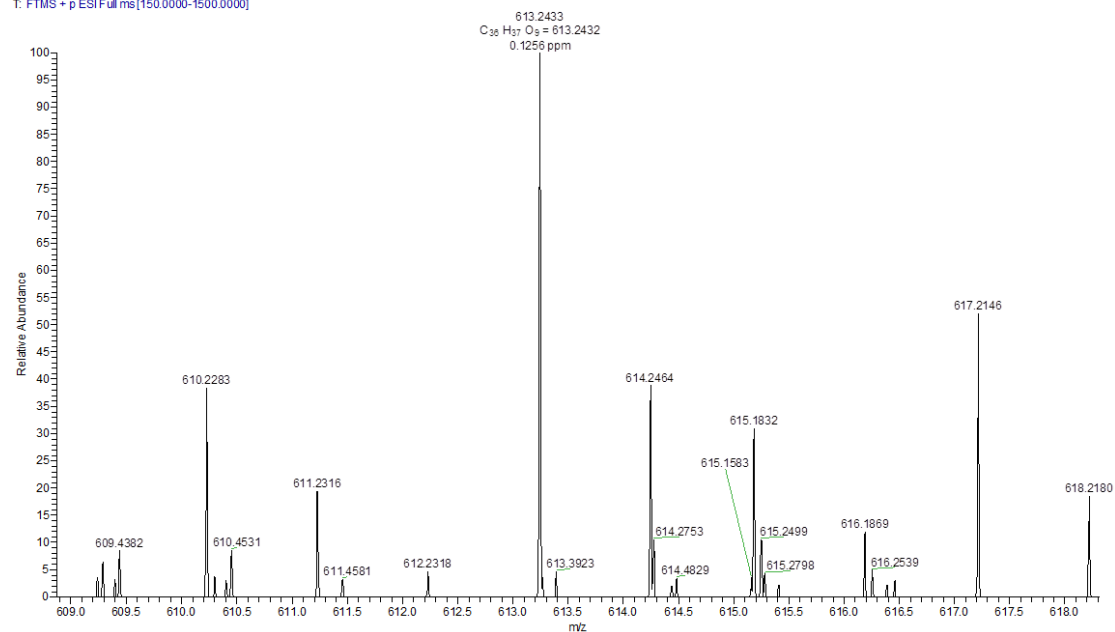

Figure S21. HR-ESI-MS spectrum of compound 29.

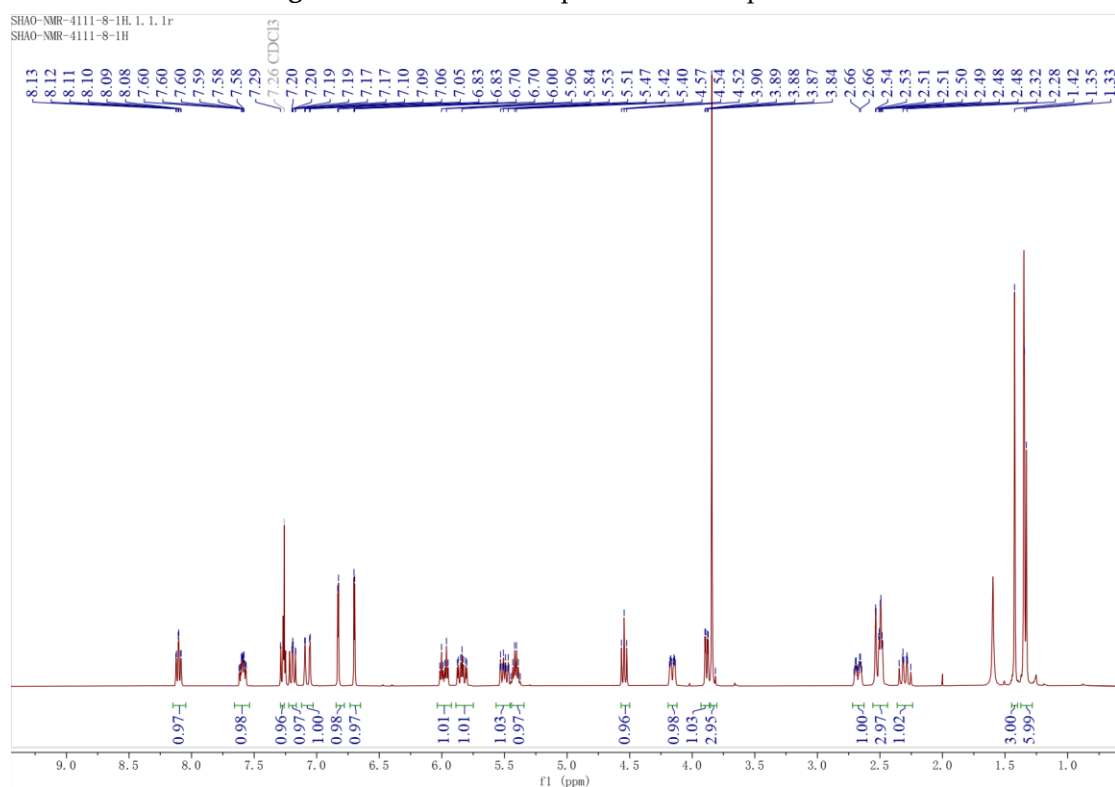

Figure S22. <sup>1</sup>H NMR (400 MHz, Chloroform-*d*) spectrum of compound 30.

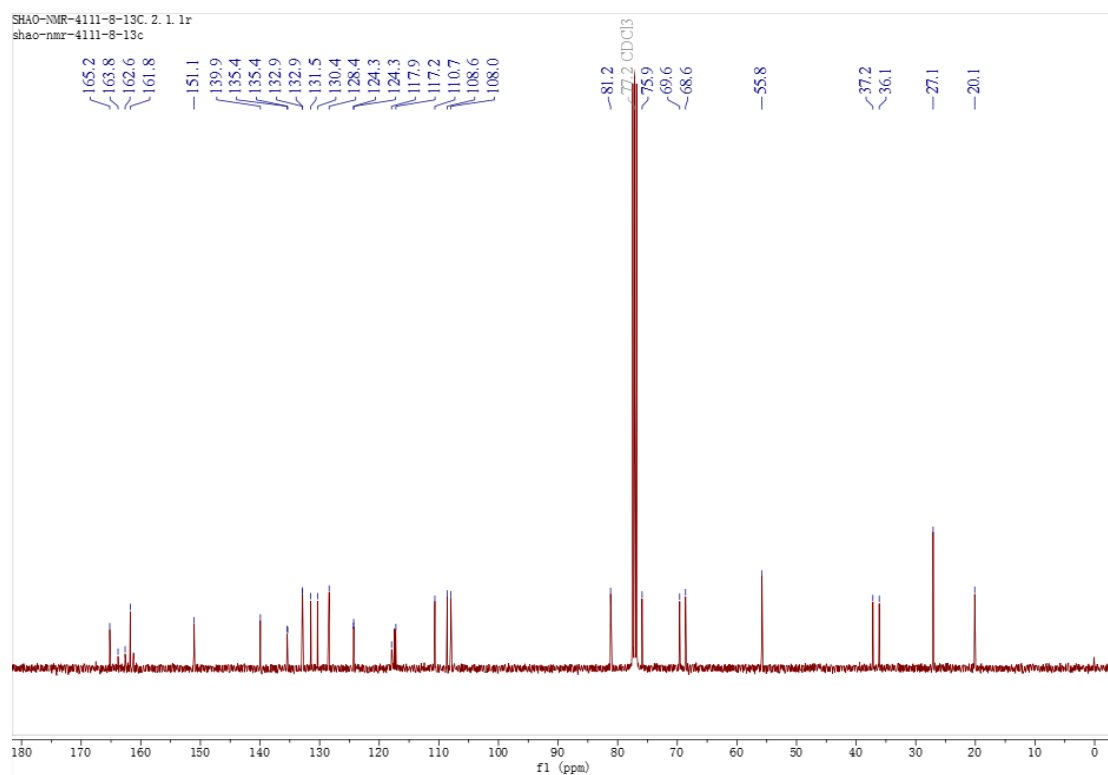

**Figure S23.** <sup>13</sup>C NMR (100 MHz, Chloroform-*d*) spectrum of compound 30.

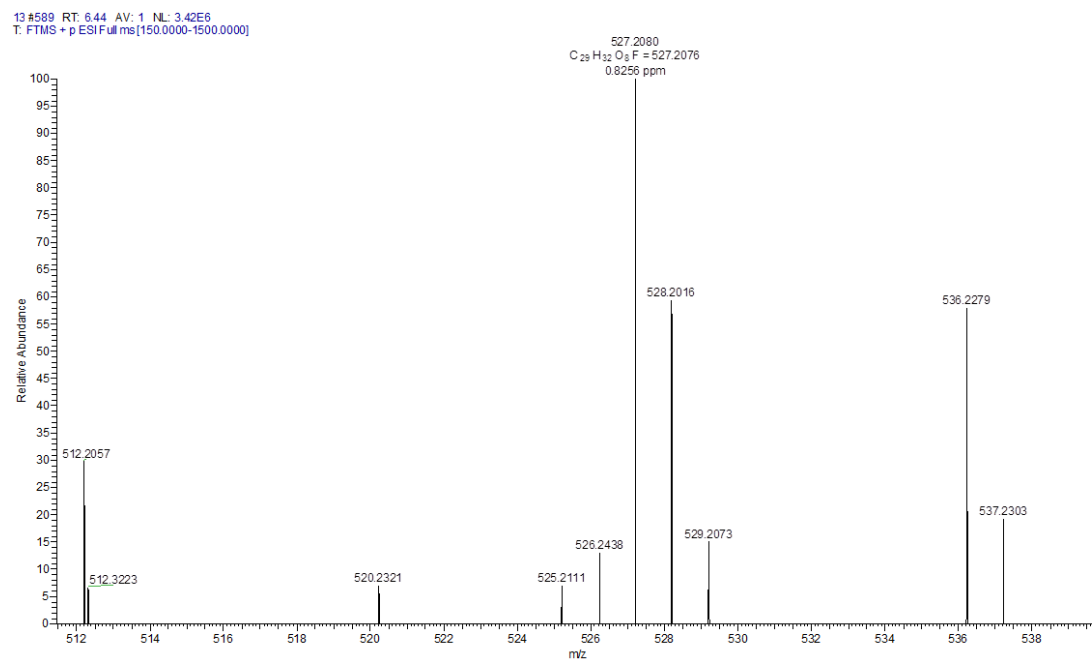

**Figure S24.** HR-ESI-MS spectrum of compound 30.

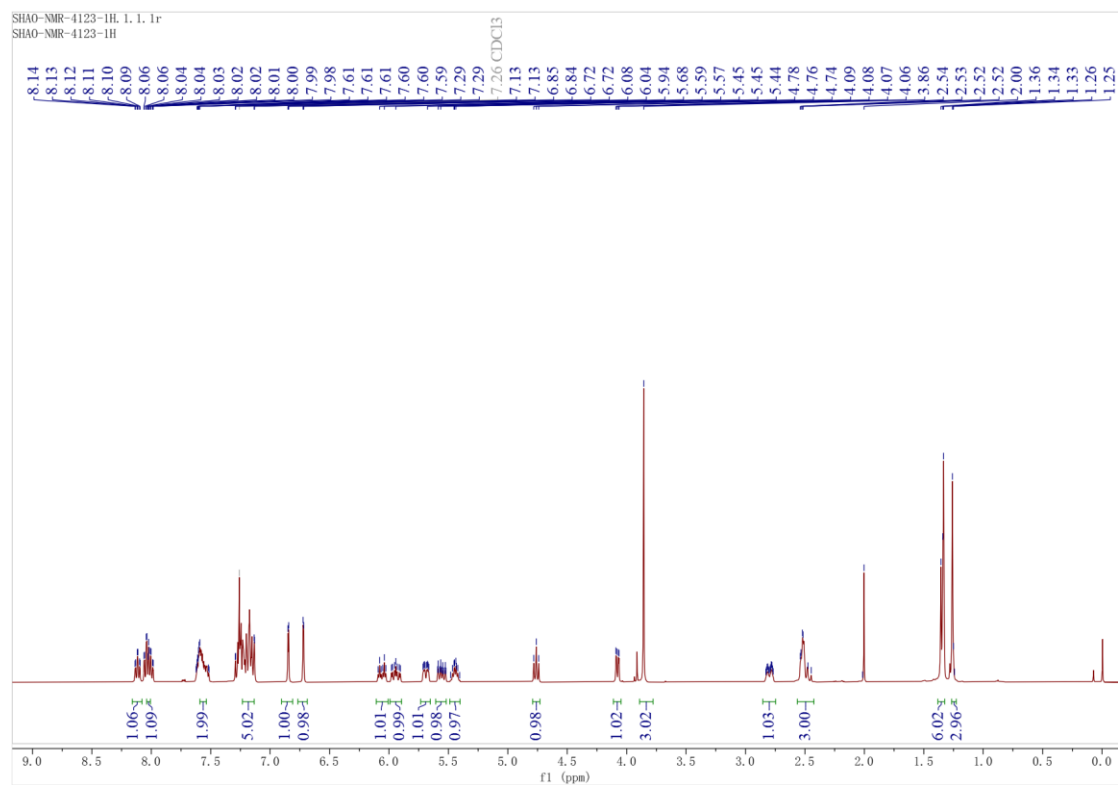

**Figure S25.** <sup>1</sup>H NMR (400 MHz, Chloroform-*d*) spectrum of compound **31**.

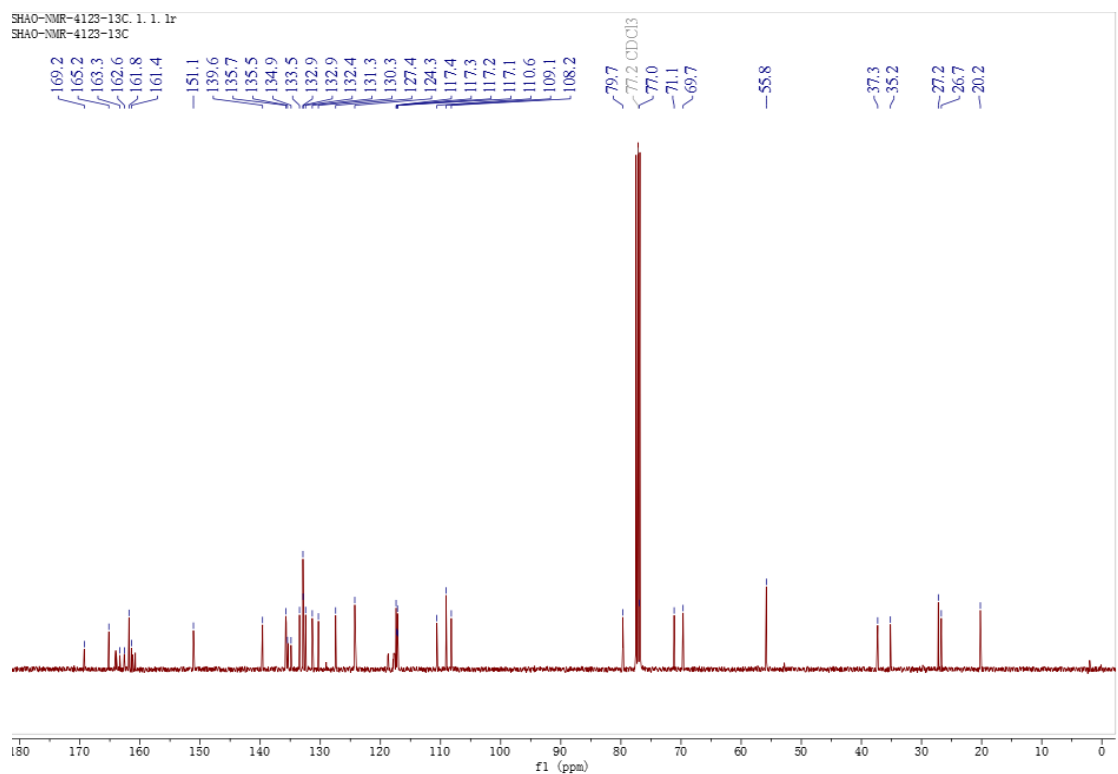

**Figure S26.** <sup>13</sup>C NMR (100 MHz, Chloroform-*d*) spectrum of compound **31**.

11#759 RT: 8.30 AV: 1 NL: 2.42E5  
T: FTMS + p ESI Full ms[150.0000-1500.0000]

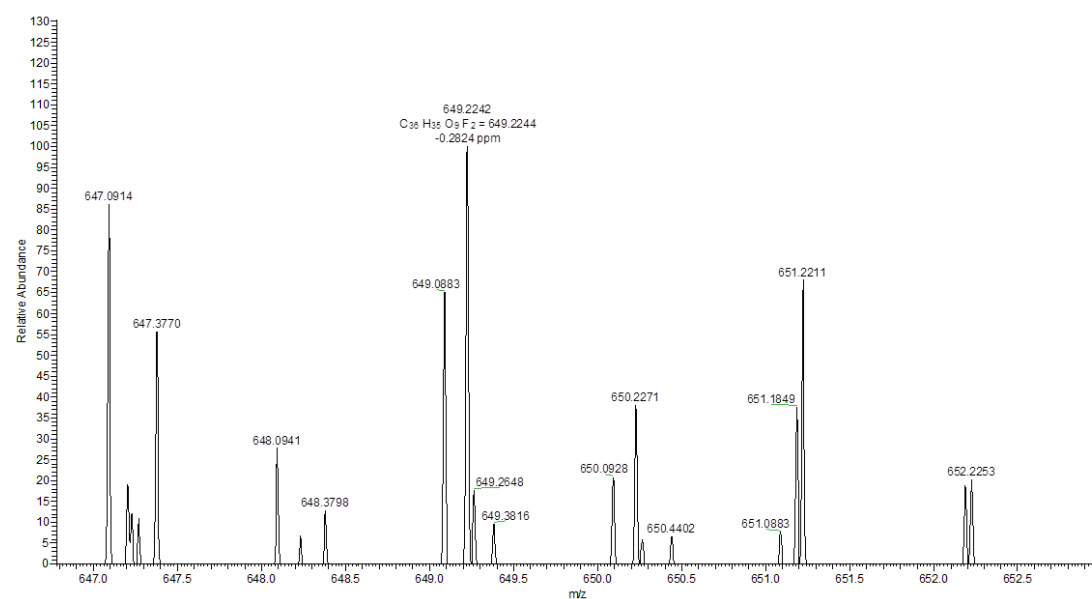

Figure S27. HR-ESI-MS spectrum of compound 31.

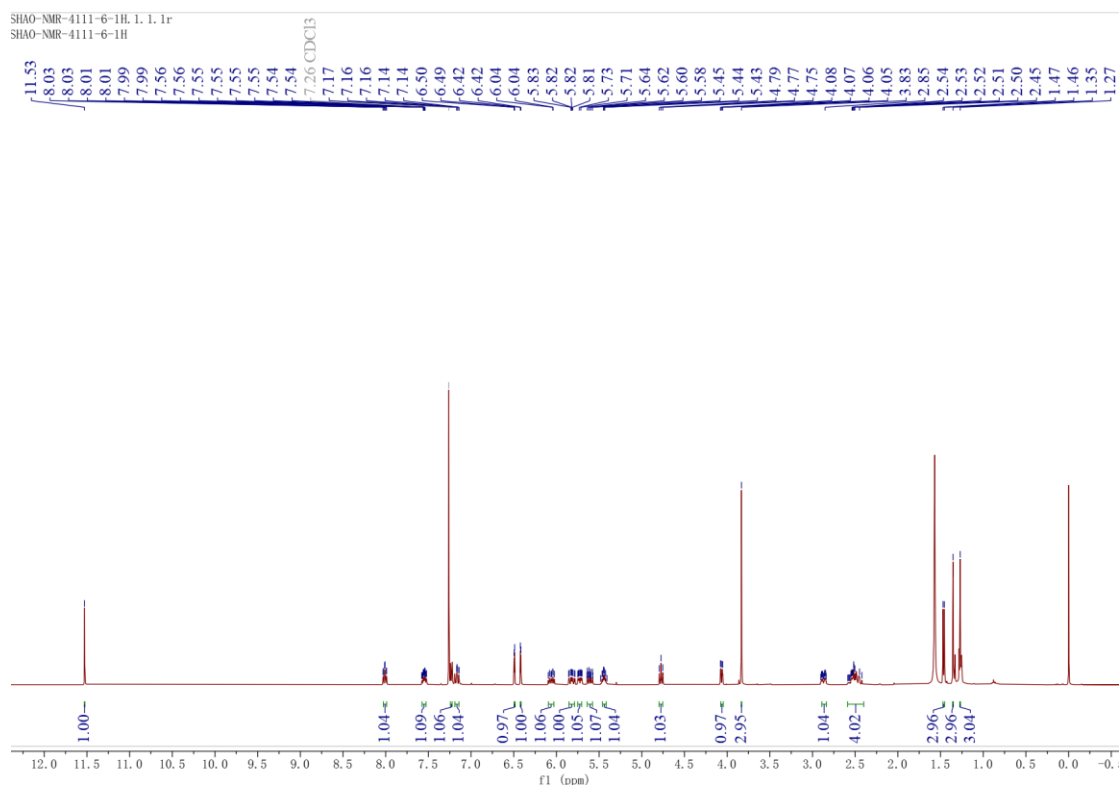

Figure S28. <sup>1</sup>H NMR (400 MHz, Chloroform-*d*) spectrum of compound 32.

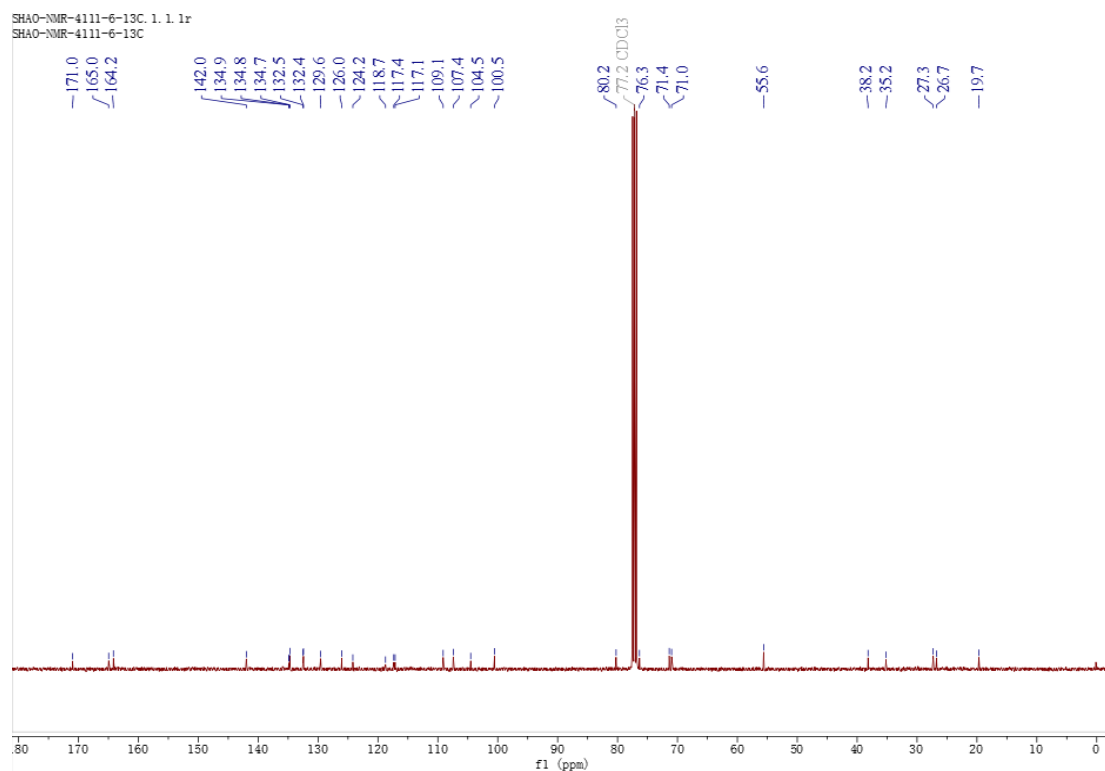

**Figure S29.**  $^{13}\text{C}$  NMR (100 MHz, Chloroform-*d*) spectrum of compound **32**.

12#759 RT: 8.23 AV: 1 NL: 1.71E7  
T: FTMS + p ESI Full ms [150.0000-1500.0000]

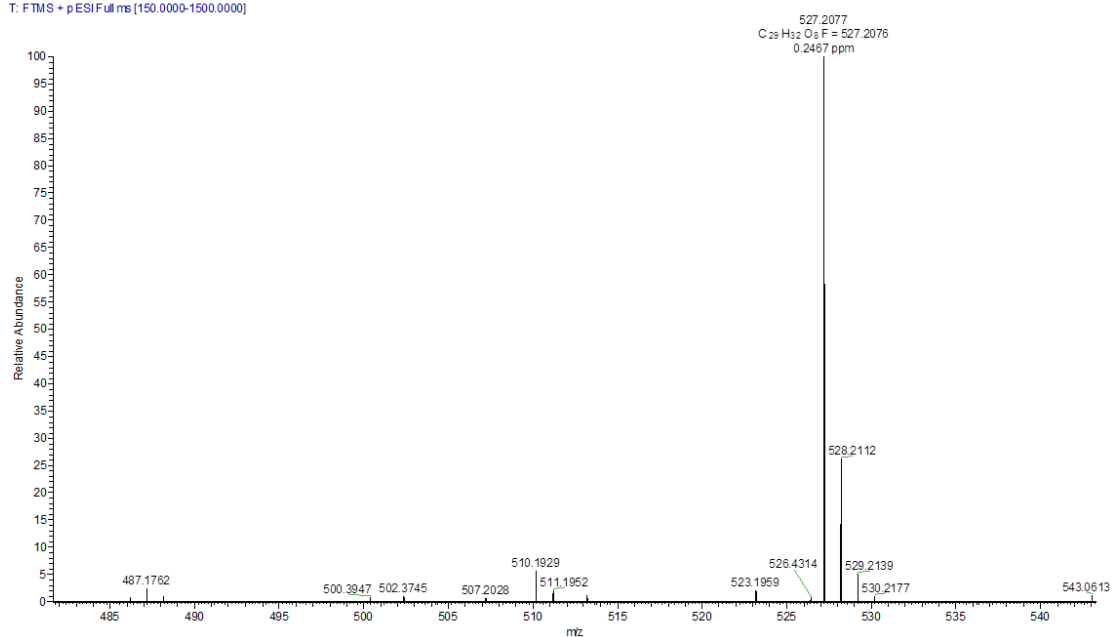

**Figure S30.** HR-ESI-MS spectrum of compound **32**.

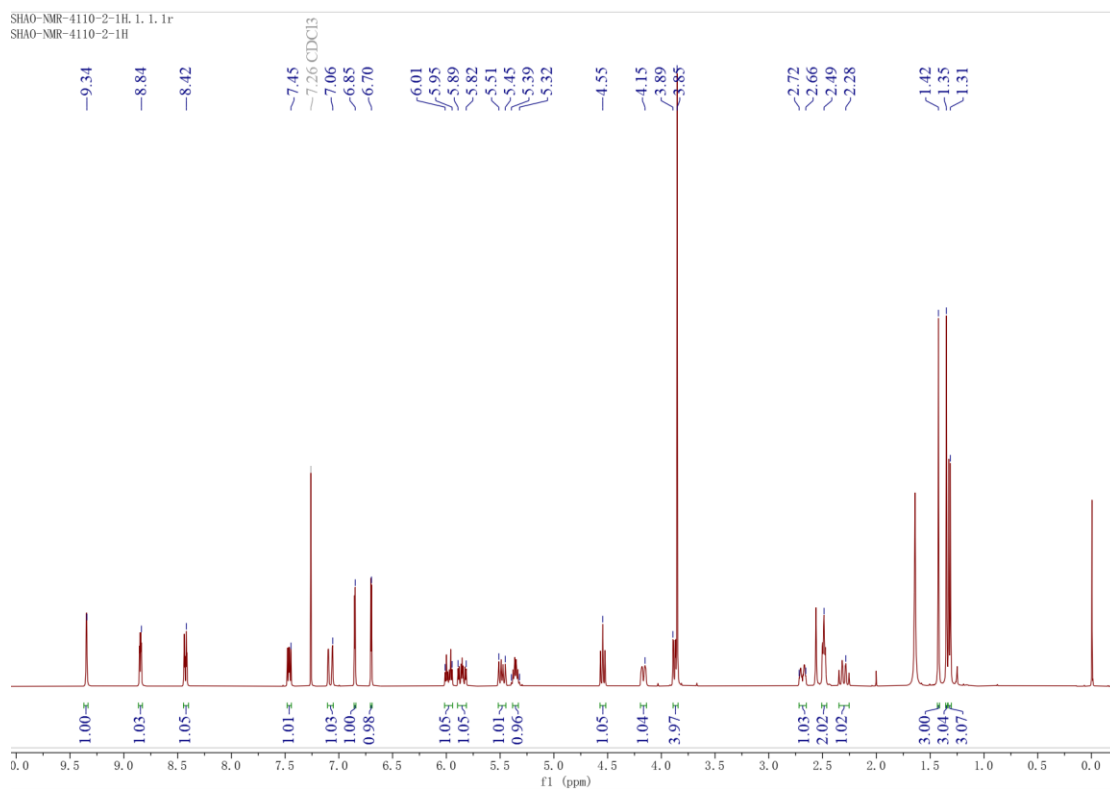

**Figure S31.** <sup>1</sup>H NMR (400 MHz, Chloroform-*d*) spectrum of compound **33**.

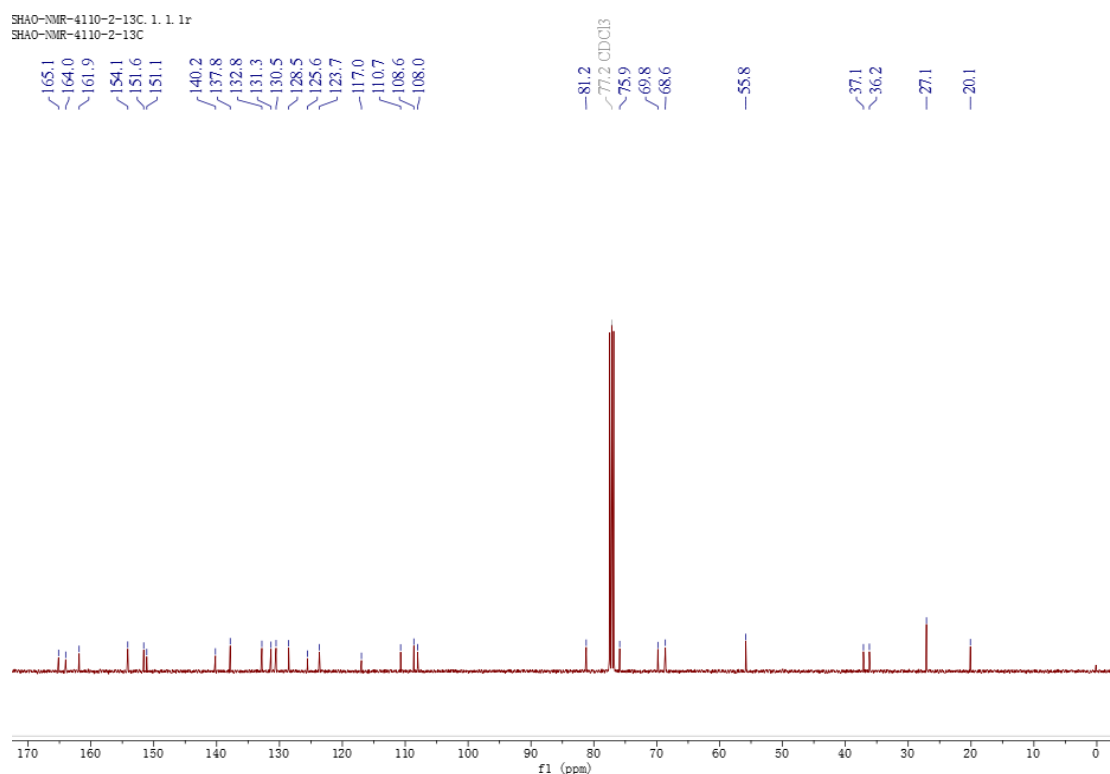

**Figure S32.** <sup>13</sup>C NMR (100 MHz, Chloroform-*d*) spectrum of compound **33**.

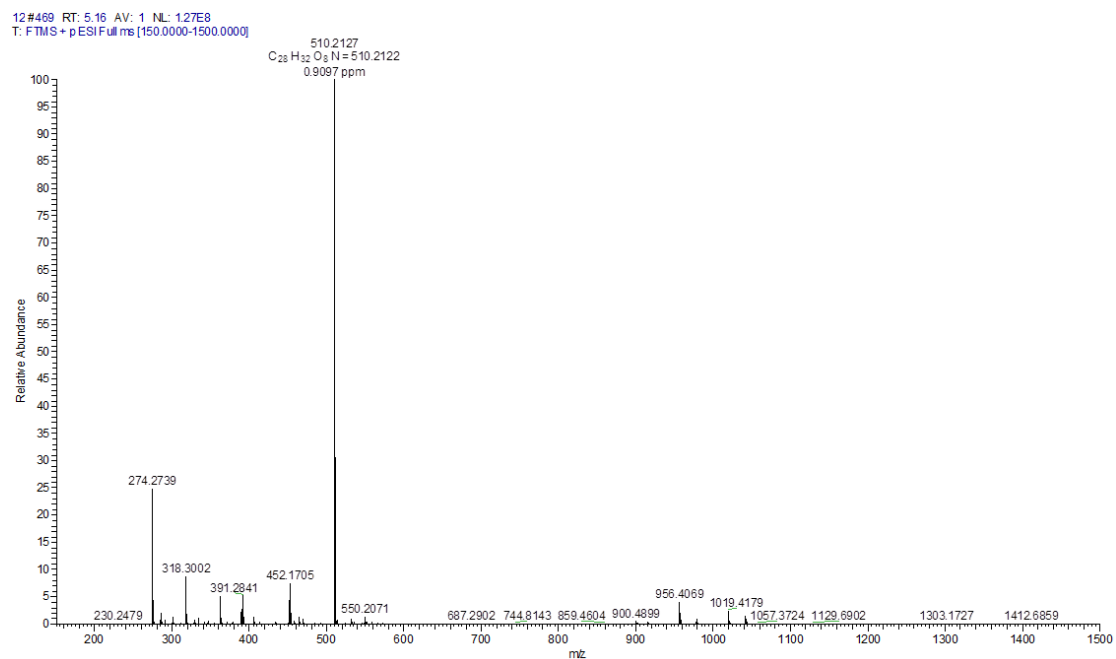

**Figure S33.** HR-ESI-MS spectrum of compound **33**.

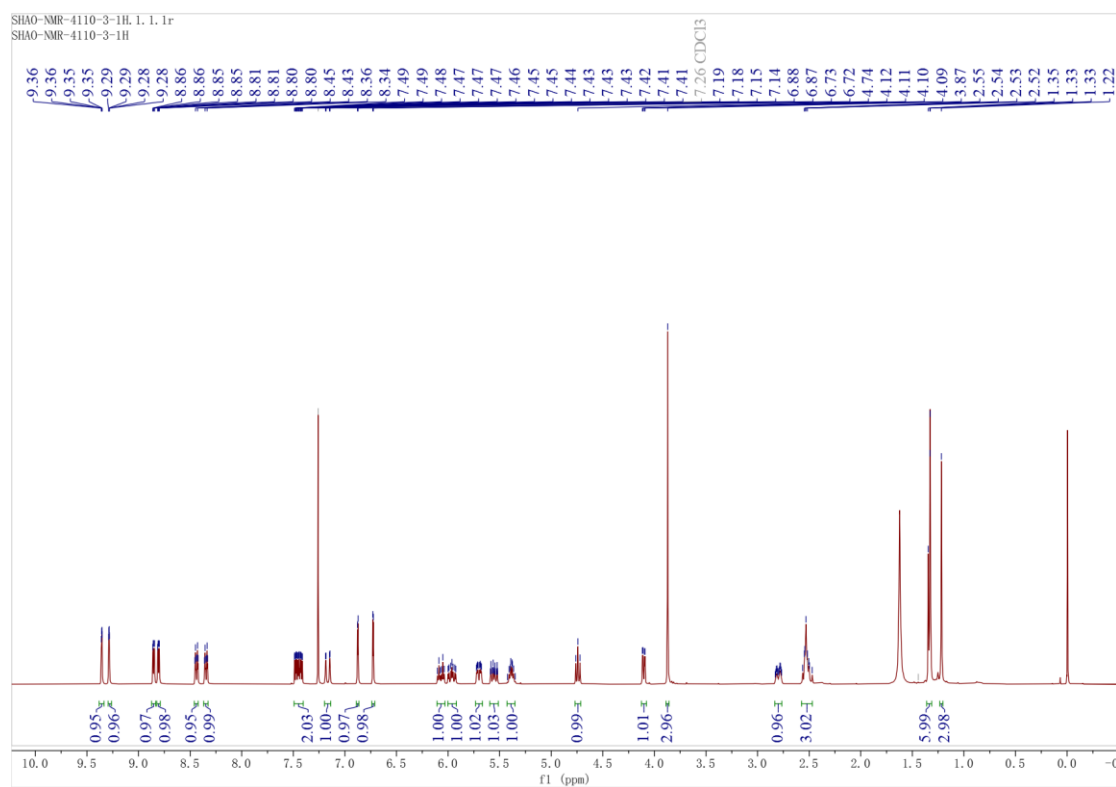

**Figure S34.**  $^1H$  NMR (400 MHz, Chloroform- $d$ ) spectrum of compound **34**.

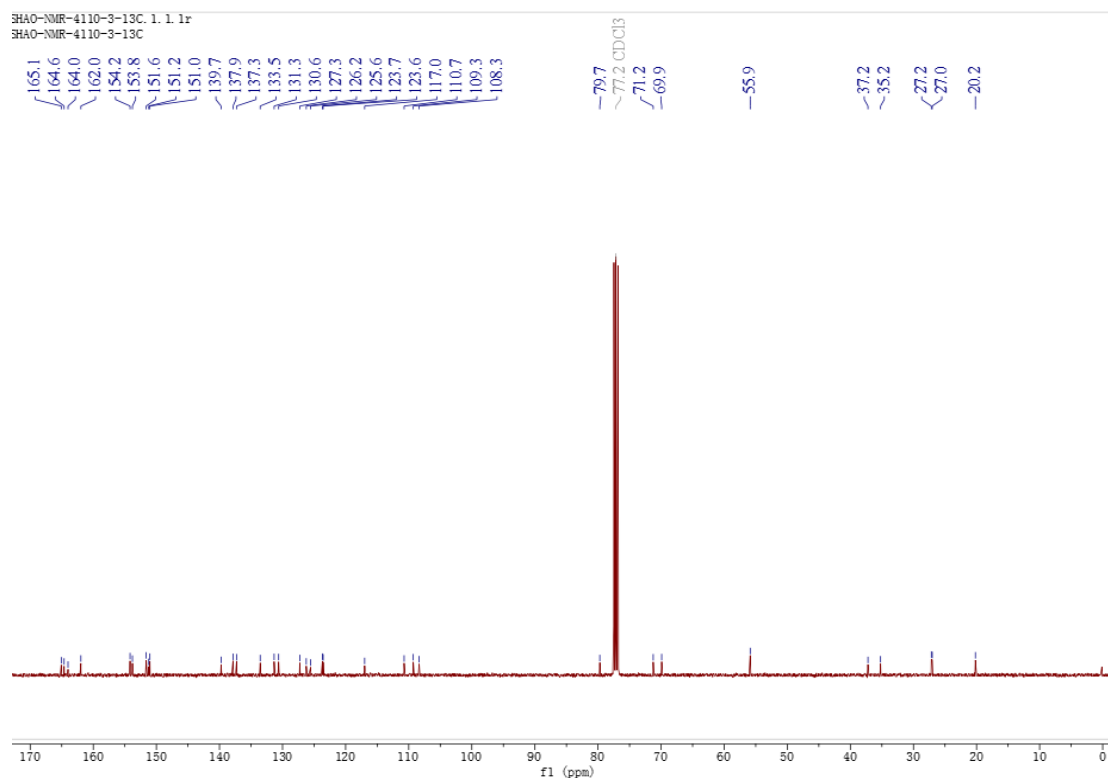

**Figure S35**  $^{13}\text{C}$  NMR (100 MHz, Chloroform-*d*) spectrum of compound **34**.

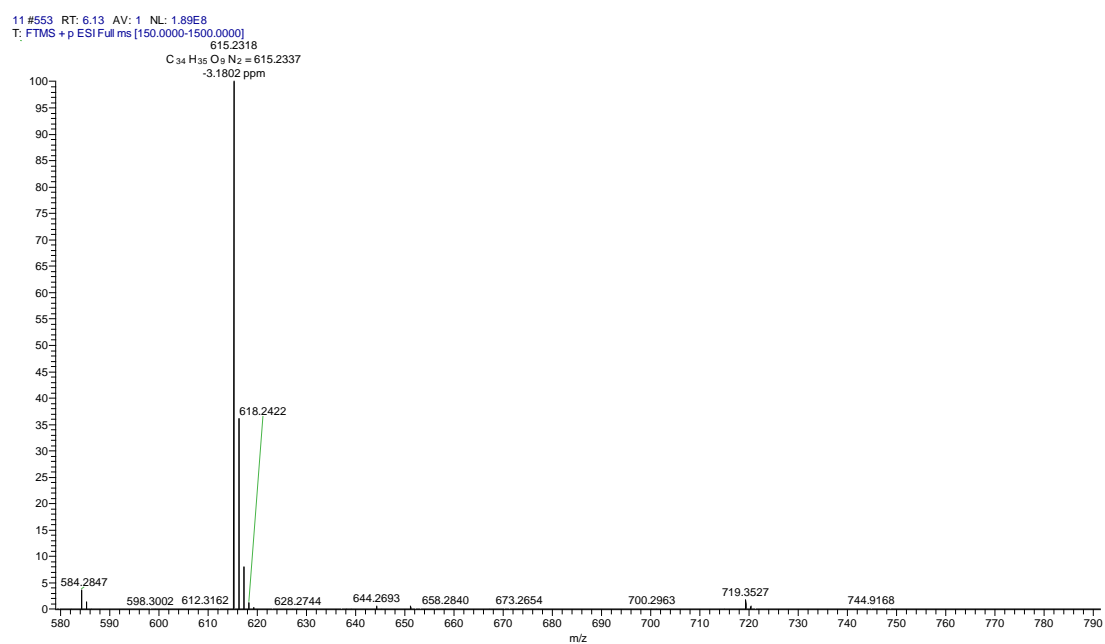

**Figure S36.** HR-ESI-MS spectrum of compound **34**.



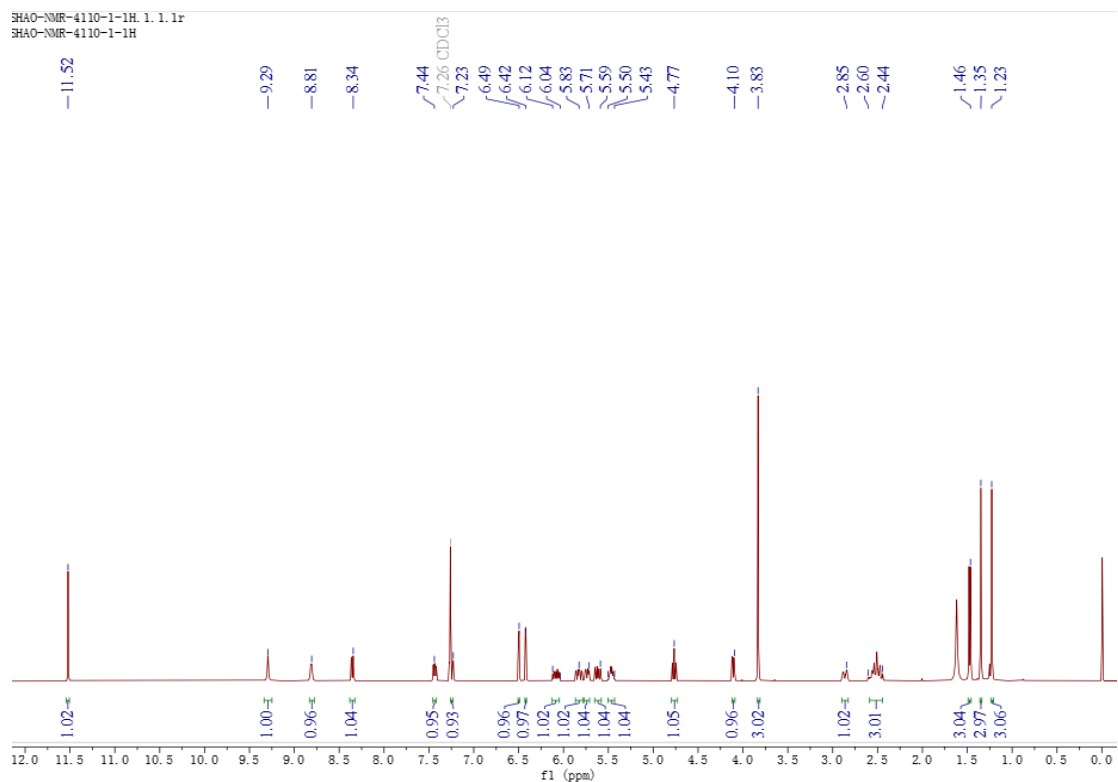

**Figure S37.** <sup>1</sup>H NMR (400 MHz, Chloroform-*d*) spectrum of compound **35**.

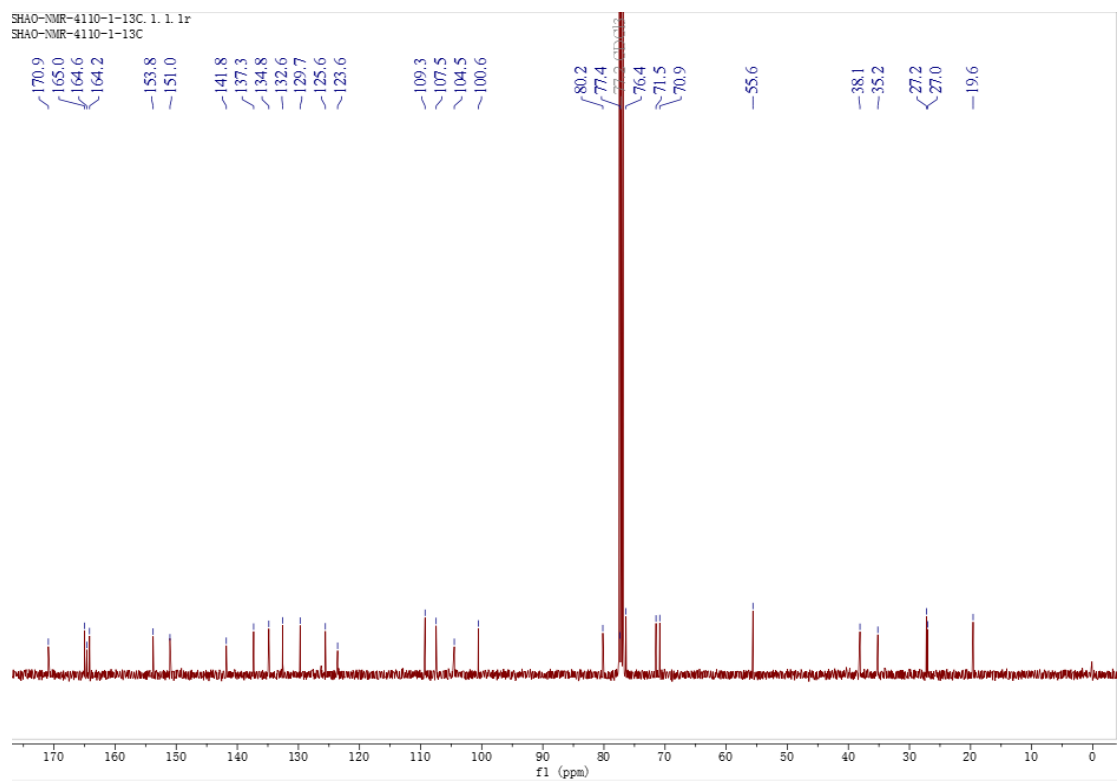

**Figure S38.** <sup>13</sup>C NMR (100 MHz, Chloroform-*d*) spectrum of compound **35**.

11#631 RT: 6.95 AV: 1 NL: 2.48E9  
T: FTMS + p ESIFull.ms [150.0000-1500.0000]

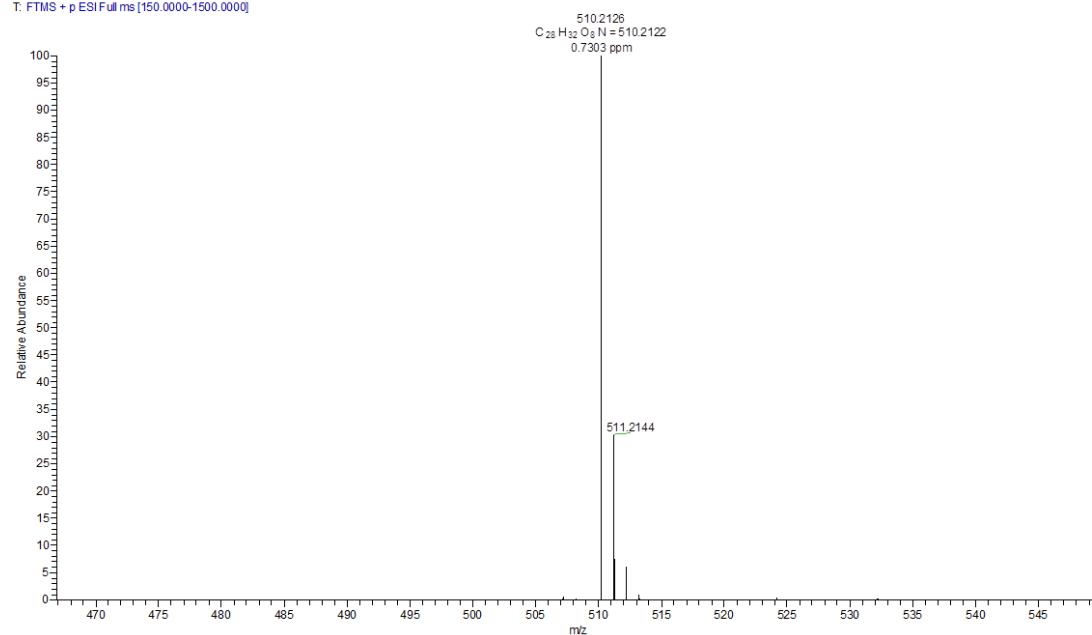

**Figure S39.** HR-ESI-MS spectrum of compound 35.

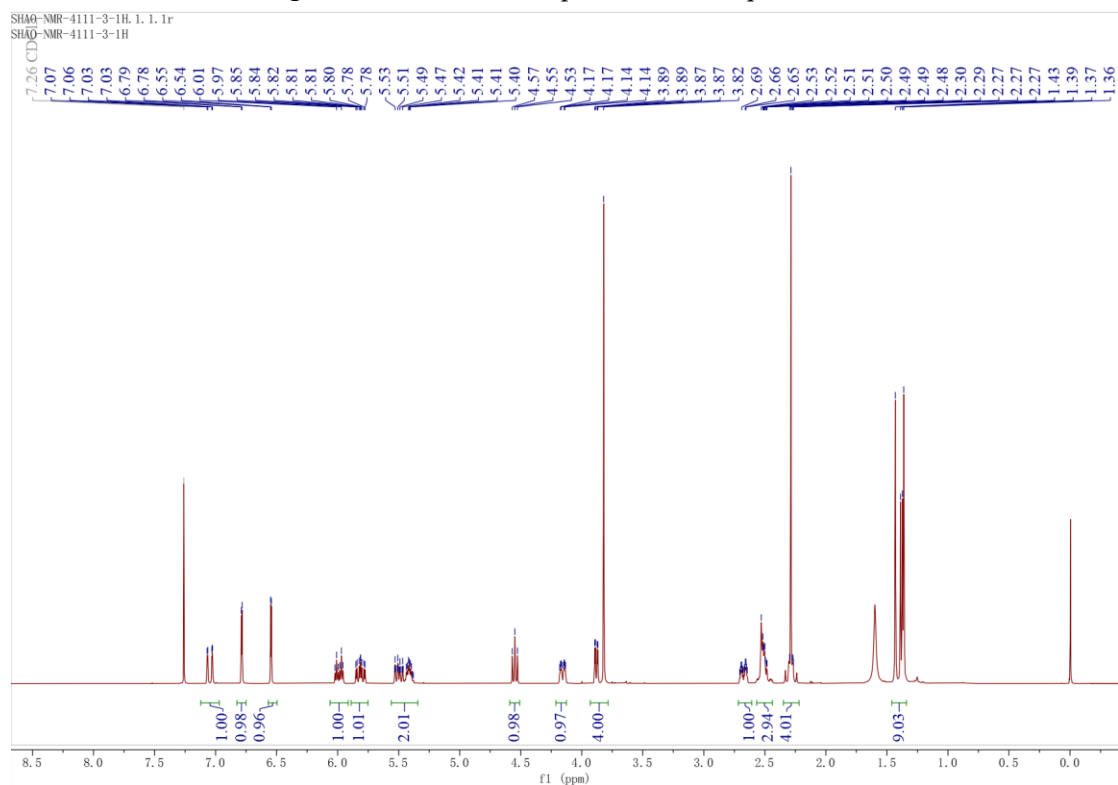

**Figure S40.** <sup>1</sup>H NMR (400 MHz, Chloroform-*d*) spectrum of compound 36.

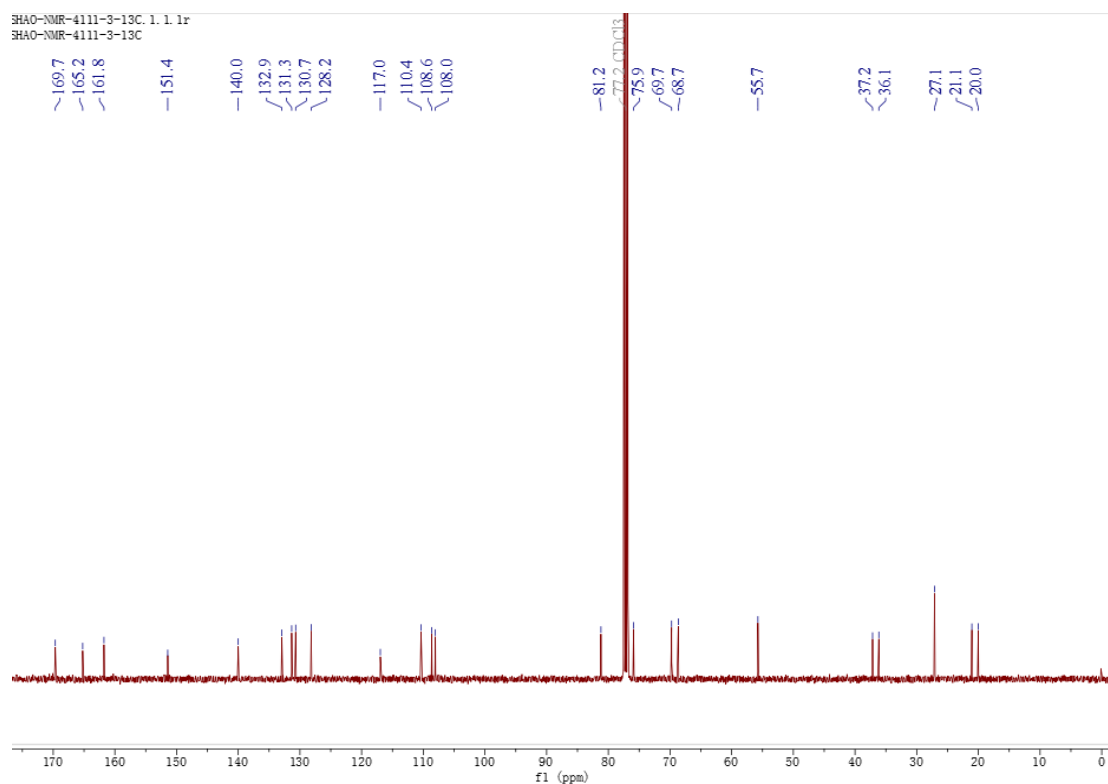

**Figure S41.** <sup>13</sup>C NMR (100 MHz, Chloroform-*d*) spectrum of compound **36**.

11#437 RT: 4.91 AV: 1 NL: 7.29E5  
T: FTMS → p ESI Full ms [150.0000-1500.0000]

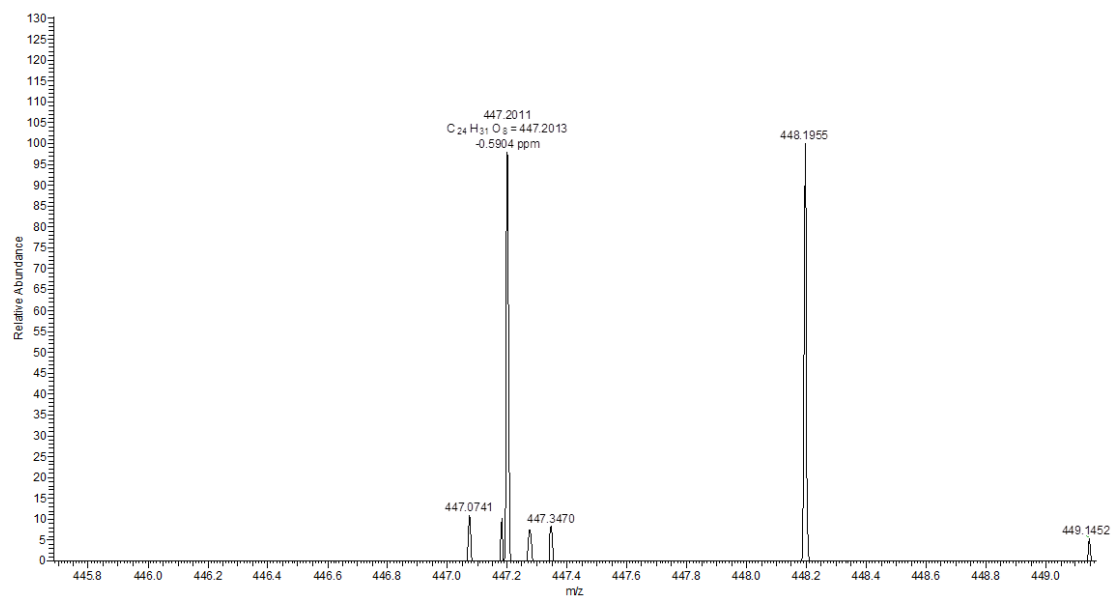

**Figure S42.** HR-ESI-MS spectrum of compound **36**

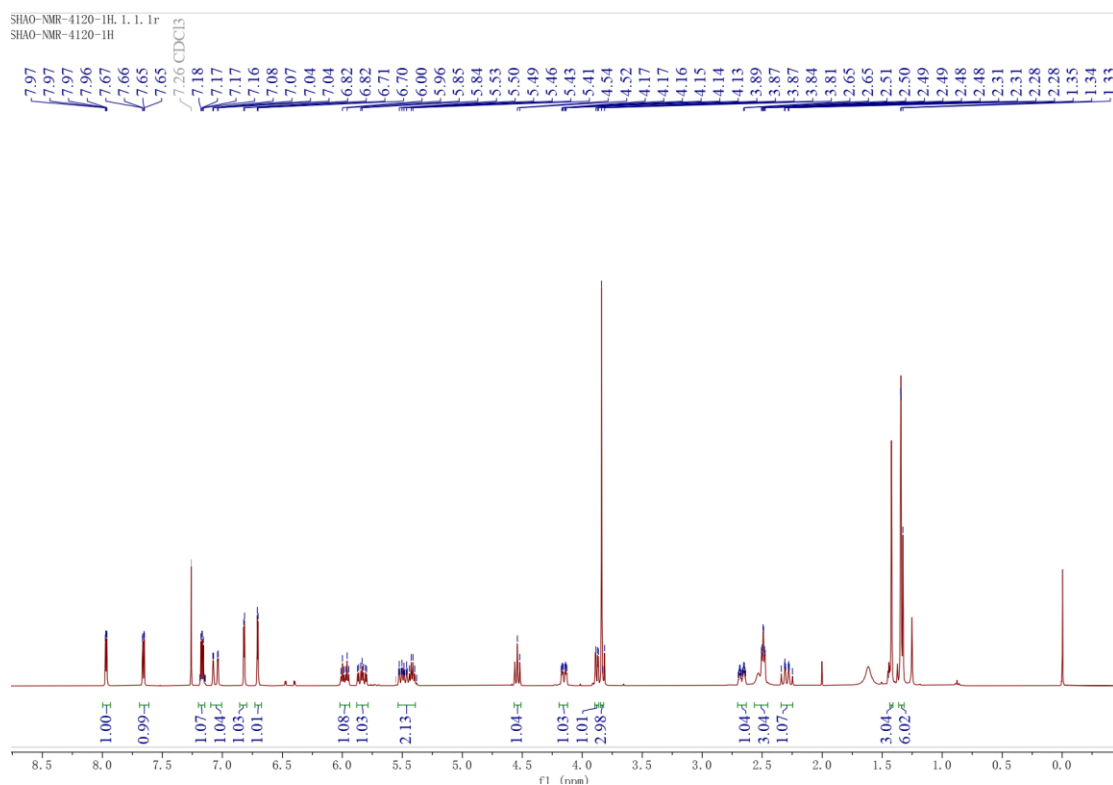

**Figure S43.**  $^1\text{H}$  NMR (400 MHz, Chloroform-*d*) spectrum of compound 37.

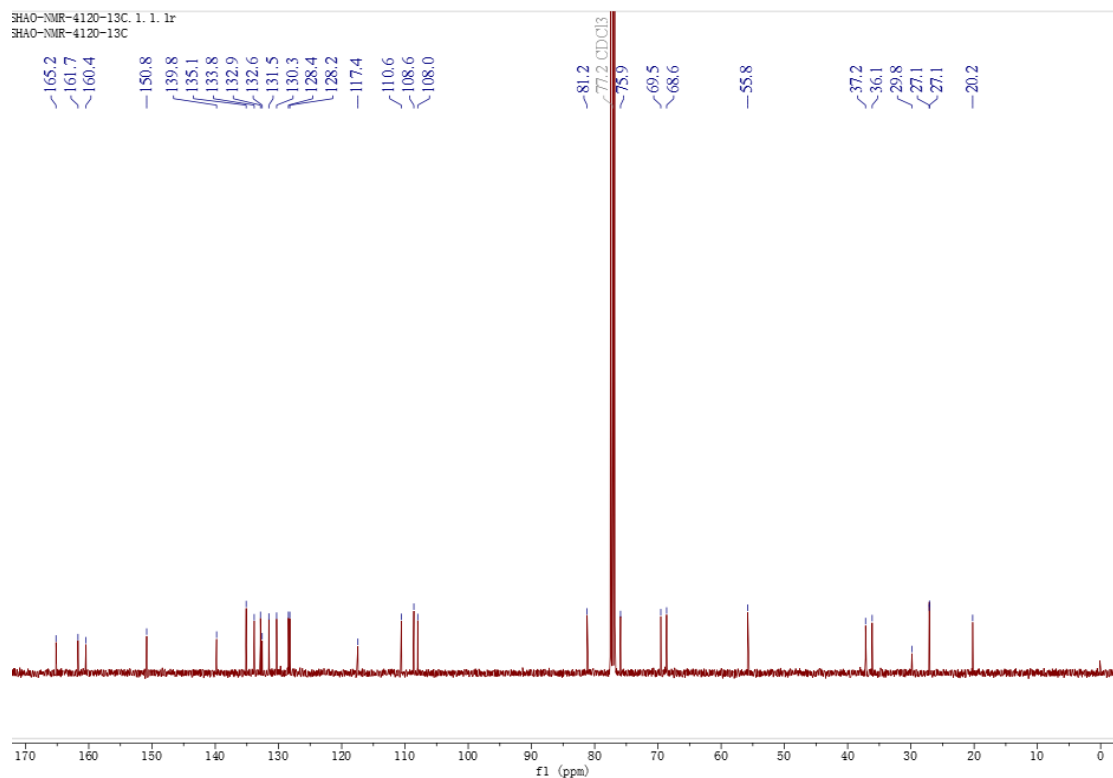

**Figure S44.**  $^{13}\text{C}$  NMR (100 MHz, Chloroform-*d*) spectrum of compound 37.

16 #571 RT: 6.24 AV: 1 NL: 3.26E6  
T: FTMS + p ESIFull.ms[150.0000-1500.0000]

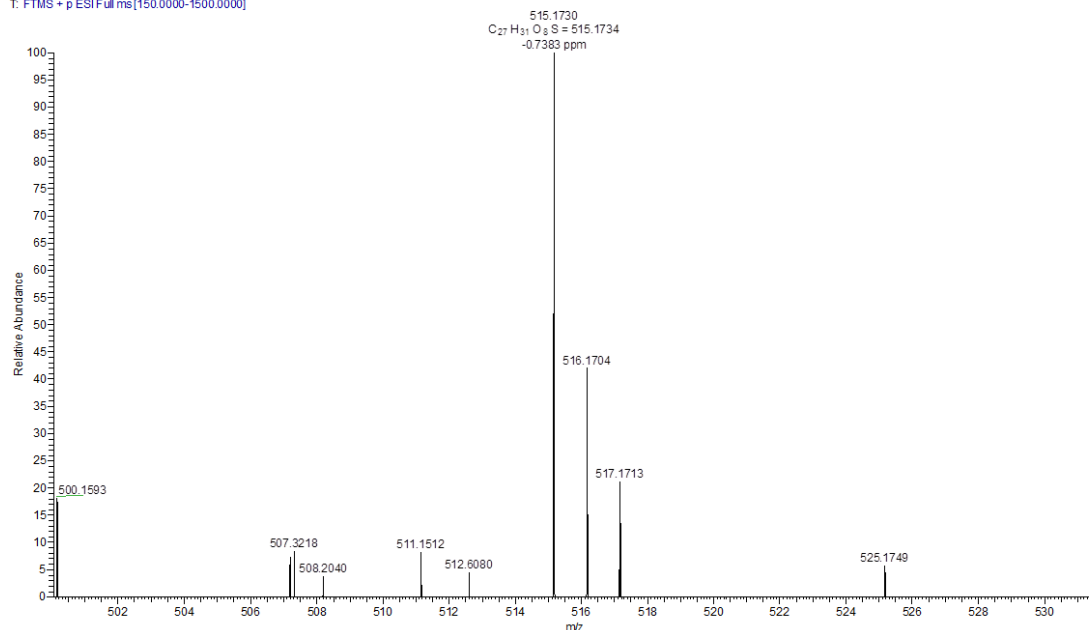

Figure S45. HR-ESI-MS spectrum of compound 37.

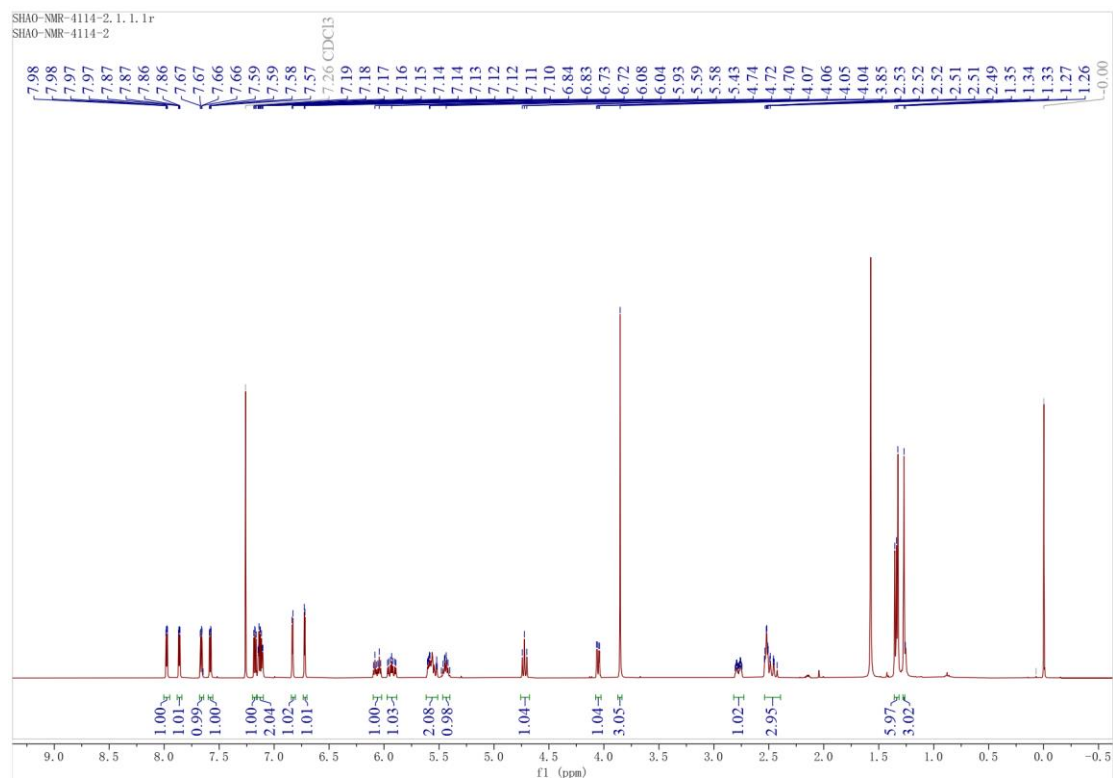

Figure S46. <sup>1</sup>H NMR (400 MHz, Chloroform-*d*) spectrum of compound 38.

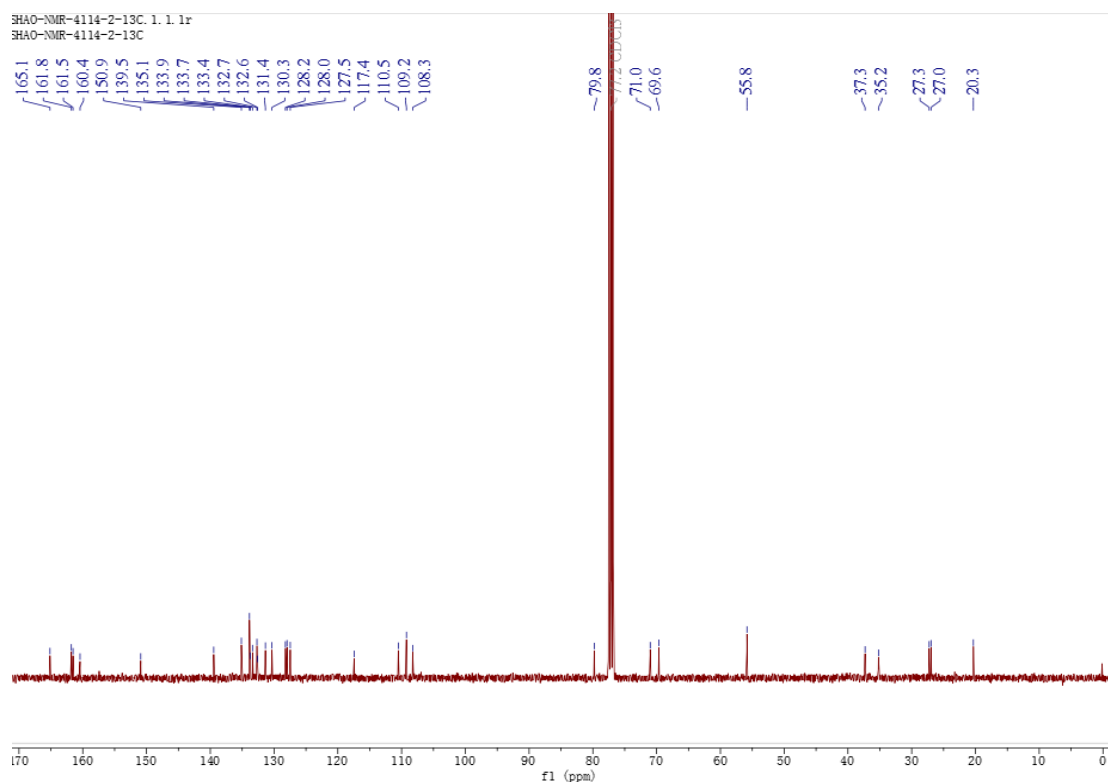

**Figure S47.**  $^{13}\text{C}$  NMR (100 MHz, Chloroform-*d*) spectrum of compound **38**.

13 #731 RT: 7.93 AV: 1 NL: 4.97E4  
T: FTMS + p ESI Full ms [150.0000-1500.0000]

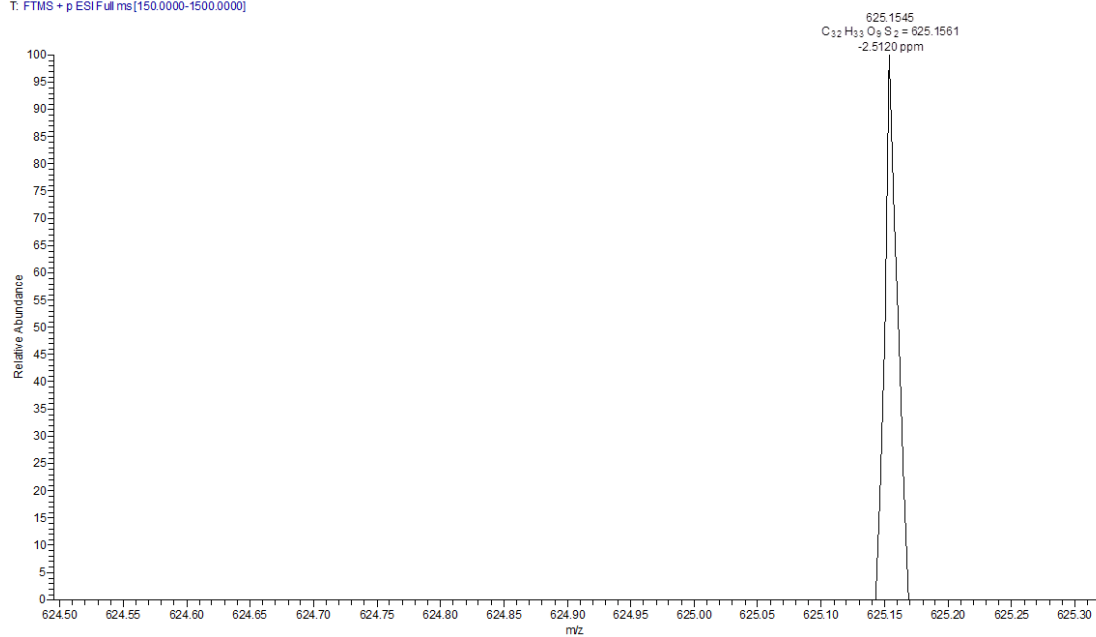

**Figure S48.** HR-ESI-MS spectrum of compound **38**.
